# Supplementary material
Source: publisher figshare collection journal article supplement (https://gsapubs.figshare.com/articles/dataset/_/22009619)
Supplement: Supplementary file 1 [file 1]

## Sheet: LC1901
	Area	Mean	Min	Max	Major	Minor	Angle	Circ.	AR	Round	Solidity
1	2782	158.548	25	234	71.872	49.284	37.481	0.757	1.458	0.686	0.894
2	899	133.674	19	244	54.17	21.131	15.823	0.556	2.564	0.39	0.86
3	3354	174.129	34	239	101.502	42.072	81.519	0.56	2.413	0.414	0.821
4	919	153.138	46	231	53.128	22.024	33.728	0.624	2.412	0.415	0.909
5	2438	167.907	28	228	73.035	42.502	177.339	0.784	1.718	0.582	0.954
6	4449	140.592	17	238	116.169	48.762	177.86	0.618	2.382	0.42	0.9
7	18561	162.896	10	252	190.098	124.318	0.387	0.208	1.529	0.654	0.618
8	882	173.906	28	242	39.227	28.628	1.563	0.732	1.37	0.73	0.938
9	505	171.758	80	228	28.784	22.339	178.621	0.643	1.289	0.776	0.849
10	104	170.106	97	218	13.175	10.051	61.144	0.697	1.311	0.763	0.835
11	1922	158.478	34	226	65.21	37.527	14.027	0.498	1.738	0.575	0.784
12	28	176.464	140	202	8.295	4.298	174.082	0.732	1.93	0.518	0.836
13	515	160.091	42	249	38.873	16.868	57.97	0.297	2.305	0.434	0.685
14	71	174.451	105	205	12.807	7.059	131.621	0.52	1.814	0.551	0.845
15	54	143.759	90	199	11.744	5.855	122.479	0.469	2.006	0.499	0.893
16	82	165.049	70	212	14.8	7.055	99.987	0.532	2.098	0.477	0.845
17	110	184.8	76	227	16.071	8.715	159.377	0.739	1.844	0.542	0.894
18	769	187.602	55	251	32.183	30.424	14.216	0.636	1.058	0.945	0.865
19	138	168.514	54	232	16.462	10.674	129.621	0.604	1.542	0.648	0.923
20	94	167.245	79	220	14.069	8.507	42.558	0.508	1.654	0.605	0.767
21	95	172.874	85	223	13.224	9.147	130.528	0.79	1.446	0.692	0.88
22	39	192.308	116	222	7.561	6.567	71.829	0.467	1.151	0.869	0.94
23	133	185.857	58	228	16.309	10.383	44.611	0.465	1.571	0.637	0.702
24	230	172.043	52	236	21.958	13.337	114.307	0.809	1.646	0.607	0.913
25	90	185.967	108	233	13.081	8.76	33.958	0.703	1.493	0.67	0.928
26	424	206.587	62	253	25.136	21.477	69.45	0.869	1.17	0.854	0.931
27	179	164.95	83	224	22.206	10.264	163.091	0.485	2.164	0.462	0.873
28	1287	155.692	20	253	51.036	32.108	158.092	0.506	1.59	0.629	0.833
29	61	158.393	34	214	10.574	7.345	172.345	0.922	1.44	0.695	0.938
30	3971	183.05	24	244	85.533	59.112	151.559	0.782	1.447	0.691	0.934
31	12691	180.435	19	246	193.199	83.638	15.388	0.407	2.31	0.433	0.805
32	14673	154.191	11	254	181.294	103.049	37.844	0.63	1.759	0.568	0.869
33	2462	189.408	17	249	63.566	49.315	118.097	0.68	1.289	0.776	0.869
34	156	159.718	76	232	18.719	10.611	53.795	0.732	1.764	0.567	0.91
35	3281	190.936	42	247	88.478	47.215	25.79	0.68	1.874	0.534	0.904
36	1284	72.307	8	244	52.208	31.314	72.318	0.534	1.667	0.6	0.91
37	325	143.055	58	199	25.935	15.955	148.422	0.691	1.625	0.615	0.914
38	790	165.309	38	229	37.528	26.803	101.769	0.772	1.4	0.714	0.923
39	465	158.329	34	228	29.485	20.08	16.638	0.867	1.468	0.681	0.949
40	218	122.885	36	197	31.455	8.824	75.465	0.514	3.565	0.281	0.837
41	604	172.775	49	247	30.708	25.044	110.303	0.883	1.226	0.816	0.95
42	217	170.429	69	239	20.925	13.204	97.196	0.79	1.585	0.631	0.927
43	183	199.967	112	250	20.078	11.605	179.087	0.715	1.73	0.578	0.891
44	1889	177.038	29	255	65.92	36.486	16.05	0.292	1.807	0.553	0.655
45	1789	171.034	33	255	55.764	40.848	176.404	0.37	1.365	0.733	0.651
46	2169	180.309	37	254	63.91	43.212	144.022	0.711	1.479	0.676	0.899
47	448	152.44	42	223	36.598	15.586	127.962	0.619	2.348	0.426	0.892
48	1164	148.753	36	237	57.563	25.747	151.896	0.63	2.236	0.447	0.841
49	16929	176.544	22	254	164.229	131.248	48.049	0.482	1.251	0.799	0.794
50	92	182.957	112	229	16.69	7.019	70.257	0.659	2.378	0.421	0.856
51	294	120.575	29	217	22.664	16.516	106.435	0.611	1.372	0.729	0.809
52	9910	172.232	23	252	155.84	80.966	25.389	0.671	1.925	0.52	0.924
53	44	163.818	87	217	8.623	6.497	118.13	0.768	1.327	0.753	0.907
54	532	152.898	35	237	29.318	23.104	68.194	0.722	1.269	0.788	0.946
55	243	180.905	68	247	18.704	16.541	37.145	0.922	1.131	0.884	0.946
56	2076	163.744	21	252	59.957	44.085	68.915	0.433	1.36	0.735	0.75
57	90	201.389	109	242	11.394	10.057	103.794	0.794	1.133	0.883	0.918
58	43	171.209	103	215	7.754	7.061	13.782	0.804	1.098	0.911	0.945
59	32	173.719	67	215	9.699	4.201	126.723	0.676	2.309	0.433	0.821
60	154	178.987	72	239	16.968	11.556	176.615	0.673	1.468	0.681	0.903
61	211	198.512	87	248	18.096	14.846	144.938	0.805	1.219	0.82	0.902
62	193	177.332	84	229	17.126	14.349	115.019	0.472	1.194	0.838	0.867
63	395	203.565	78	251	28.75	17.493	28.093	0.744	1.643	0.608	0.913
64	5152	134.01	9	246	133.927	48.98	15.152	0.41	2.734	0.366	0.717
65	3482	129.761	10	246	117.953	37.586	172.503	0.509	3.138	0.319	0.899
66	524	158.996	23	225	30.128	22.145	150.587	0.722	1.361	0.735	0.894
67	1459	130.833	39	197	61.682	30.117	179.086	0.667	2.048	0.488	0.943
68	1263	154.092	51	205	50.81	31.65	177.065	0.607	1.605	0.623	0.879
69	17930	131.058	6	248	157.514	144.934	136.087	0.899	1.087	0.92	0.964
70	694	132.952	13	232	45.636	19.362	173.871	0.299	2.357	0.424	0.887
71	1502	102	8	238	62.936	30.386	29.402	0.696	2.071	0.483	0.926
72	801	105.729	14	252	48.166	21.174	170.432	0.543	2.275	0.44	0.778
73	1834	114.417	6	245	81.144	28.778	21.058	0.535	2.82	0.355	0.782
74	922	65.271	6	227	53.083	22.115	174.624	0.681	2.4	0.417	0.887
75	5619	134.704	8	251	100.816	70.965	159.012	0.619	1.421	0.704	0.903
76	4601	140.23	12	240	99.496	58.878	16.583	0.767	1.69	0.592	0.952
77	7106	122.219	7	248	124.289	72.795	1.581	0.628	1.707	0.586	0.92
78	2044	139.467	16	253	57.922	44.931	16.757	0.713	1.289	0.776	0.892
79	800	159.995	38	231	36.729	27.733	48.223	0.867	1.324	0.755	0.943
80	348	171.555	38	231	21.475	20.633	103.274	0.738	1.041	0.961	0.874
81	1476	152.495	24	252	65.722	28.595	168.171	0.671	2.298	0.435	0.896
82	444	183.599	42	251	32.749	17.262	32.893	0.769	1.897	0.527	0.871
83	5583	136.08	18	240	139.876	50.82	170.61	0.487	2.752	0.363	0.828
84	1366	136.827	27	223	68.374	25.437	160.437	0.595	2.688	0.372	0.875
85	1833	138.779	22	215	52.605	44.366	5.049	0.909	1.186	0.843	0.954
86	5525	107.619	15	204	96.872	72.618	30.562	0.853	1.334	0.75	0.93
87	8019	135.284	10	248	106.576	95.801	54.643	0.668	1.112	0.899	0.885
88	1268	162.406	26	253	46.666	34.596	120.411	0.803	1.349	0.741	0.924
89	1104	160.49	28	236	46.914	29.963	162.585	0.846	1.566	0.639	0.931
90	1233	134.114	27	229	59.754	26.273	161.051	0.47	2.274	0.44	0.834
91	6842	158.753	13	250	111.283	78.282	0.758	0.807	1.422	0.703	0.949
92	7448	156.894	12	253	112.233	84.495	15.366	0.804	1.328	0.753	0.919
93	3347	178.444	15	252	73.368	58.085	116.035	0.828	1.263	0.792	0.925
94	2666	147.727	14	243	70.348	48.252	12.47	0.876	1.458	0.686	0.949
95	692	133.903	29	212	33.903	25.988	4.266	0.723	1.305	0.767	0.906
96	601	157.331	29	251	30.74	24.893	123.948	0.696	1.235	0.81	0.908
97	1533	147.552	33	249	55.775	34.996	27.949	0.866	1.594	0.627	0.949
98	3506	167.718	18	251	77.608	57.52	176.868	0.756	1.349	0.741	0.966
99	2824	150.201	11	245	80.936	44.426	70.245	0.779	1.822	0.549	0.941
100	1403	138.465	14	246	62.99	28.36	174.814	0.559	2.221	0.45	0.863
101	513	188.487	28	251	29.893	21.851	82.786	0.709	1.368	0.731	0.9
102	1621	170.751	21	254	67.515	30.57	157.804	0.704	2.209	0.453	0.914
103	5039	175.737	24	252	95.939	66.874	170.309	0.571	1.435	0.697	0.884
104	5447	133.336	12	247	122.727	56.51	14.437	0.521	2.172	0.46	0.75
105	941	173.047	38	251	41.11	29.144	112.265	0.665	1.411	0.709	0.886
106	4583	97.776	10	252	89.599	65.126	173.878	0.813	1.376	0.727	0.942
107	208	147.462	16	225	22.039	12.017	94.494	0.485	1.834	0.545	0.86
108	9997	168.353	18	252	135.588	93.877	156.376	0.868	1.444	0.692	0.969
109	4341	152.539	20	253	84.419	65.473	3.816	0.679	1.289	0.776	0.949
110	850	143.004	37	203	42.36	25.549	115.753	0.681	1.658	0.603	0.887
111	478	147.95	28	209	30.711	19.817	95.292	0.838	1.55	0.645	0.923
112	5305	130.381	18	217	109.036	61.948	26.025	0.456	1.76	0.568	0.727
113	333	147.766	28	227	23.574	17.986	121.422	0.921	1.311	0.763	0.951
114	2300	169.126	21	250	74.927	39.084	6.03	0.737	1.917	0.522	0.939
115	549	166.556	23	226	30.01	23.292	156.406	0.842	1.288	0.776	0.97
116	1816	188.849	41	248	65.619	35.237	120.895	0.473	1.862	0.537	0.897
117	895	187.517	33	240	40.928	27.843	9.278	0.865	1.47	0.68	0.93
118	5224	138.957	10	242	133.464	49.837	1.379	0.554	2.678	0.373	0.896
119	975	113.43	30	237	50.293	24.683	10.998	0.763	2.038	0.491	0.911
120	709	173.13	41	226	36.872	24.483	93.594	0.848	1.506	0.664	0.93
121	280	172.936	46	235	22.403	15.913	15.399	0.846	1.408	0.71	0.909
122	32434	146.062	10	243	316.435	130.505	126.199	0.336	2.425	0.412	0.658
123	5805	109.302	7	246	108.544	68.094	172.334	0.796	1.594	0.627	0.965
124	20545	140.028	9	248	305.097	85.739	23.636	0.217	3.558	0.281	0.499
125	205	160.488	35	235	23.963	10.893	56.699	0.725	2.2	0.455	0.876
126	1160	189.37	31	252	44.945	32.861	100.481	0.74	1.368	0.731	0.89
127	1622	161.21	28	251	55.753	37.042	164.995	0.713	1.505	0.664	0.941
128	757	156.272	31	246	45.085	21.378	71.102	0.404	2.109	0.474	0.721
129	632	112.071	15	228	36.645	21.959	117.056	0.696	1.669	0.599	0.847
130	1596	133.062	13	245	70.337	28.891	8.682	0.367	2.435	0.411	0.727
131	722	131.533	11	223	32.86	27.976	101.416	0.76	1.175	0.851	0.874
132	2973	105.896	10	243	90.824	41.678	166.202	0.731	2.179	0.459	0.908
133	990	114.503	25	211	67.965	18.546	146.601	0.462	3.665	0.273	0.789
134	24201	110.482	15	220	247.967	124.265	21.043	0.569	1.995	0.501	0.863
135	3697	100.895	7	242	95.971	49.048	172.881	0.621	1.957	0.511	0.851
136	6382	140.977	25	227	146.311	55.538	157.534	0.468	2.634	0.38	0.764
137	210	147.686	48	215	17.886	14.949	15.455	0.668	1.196	0.836	0.897
138	2633	168.586	25	246	107.369	31.224	6.064	0.555	3.439	0.291	0.898
139	489	157.806	31	249	34.352	18.125	6.395	0.696	1.895	0.528	0.843
140	4253	95.565	8	232	107.505	50.371	157.126	0.227	2.134	0.469	0.526
141	6422	105.125	9	236	161.315	50.688	11.144	0.271	3.182	0.314	0.64
142	623	114.422	12	221	36.246	21.885	34.631	0.78	1.656	0.604	0.913
143	242	142.384	24	224	24.762	12.443	59.161	0.725	1.99	0.503	0.883
144	633	138.393	16	237	37.63	21.418	127.281	0.692	1.757	0.569	0.879
145	593	167.69	25	247	35.955	21	179.812	0.789	1.712	0.584	0.95
146	361	176.67	43	240	37.975	12.104	175.524	0.517	3.137	0.319	0.817
147	425	176.814	38	245	24.153	22.404	103.398	0.887	1.078	0.928	0.936
148	3085	111.281	22	188	83.145	47.242	18.372	0.566	1.76	0.568	0.828
149	993	166.36	33	244	50.106	25.233	2.588	0.66	1.986	0.504	0.874
150	193	113.964	21	216	22.108	11.115	29.076	0.71	1.989	0.503	0.862
151	636	148.08	36	231	30.179	26.833	7.414	0.847	1.125	0.889	0.903
152	248	148.375	17	240	24.162	13.069	51.485	0.715	1.849	0.541	0.886
153	3745	129.364	15	239	90.796	52.516	57.313	0.603	1.729	0.578	0.813
154	1428	120.939	15	232	64.467	28.203	5.509	0.447	2.286	0.437	0.69
155	643	155.193	29	244	38.006	21.541	17.282	0.807	1.764	0.567	0.935
156	3754	118.679	13	230	93.703	51.009	151.89	0.608	1.837	0.544	0.87
157	5007	121.377	23	225	93.002	68.548	14.985	0.564	1.357	0.737	0.794
158	125	150.944	48	224	21.37	7.447	24.126	0.489	2.87	0.348	0.702
159	1439	149.914	30	222	53.589	34.19	156.408	0.851	1.567	0.638	0.938
160	25974	129.35	22	239	261.854	126.296	40.043	0.547	2.073	0.482	0.767
161	1114	144.039	26	201	61.941	22.899	55.281	0.609	2.705	0.37	0.887
162	19300	143.423	14	254	184.442	133.231	8.936	0.491	1.384	0.722	0.835
163	2164	133.145	15	224	68.41	40.276	150.58	0.695	1.699	0.589	0.909
164	17474	121.322	9	250	196.213	113.39	29.374	0.379	1.73	0.578	0.761
165	1230	143.211	23	253	43.436	36.055	2.522	0.467	1.205	0.83	0.936
166	412	177.143	22	248	26.62	19.706	27.897	0.939	1.351	0.74	0.941
167	5390	105.985	15	255	135.835	50.523	29.647	0.615	2.689	0.372	0.887
168	2882	151.181	15	244	72.432	50.661	165.823	0.903	1.43	0.699	0.968
169	581	136.317	15	247	33.986	21.767	167.075	0.896	1.561	0.64	0.946
170	555	183.18	37	247	33.404	21.155	26.098	0.837	1.579	0.633	0.922
171	592	123.61	20	196	37.134	20.298	146.343	0.709	1.829	0.547	0.9
172	721	110.404	20	222	41.048	22.364	16.403	0.718	1.835	0.545	0.856
173	1708	136.412	40	220	64.047	33.955	20.069	0.744	1.886	0.53	0.901
174	2329	167.187	27	248	69.098	42.916	163.107	0.832	1.61	0.621	0.944
175	1333	174.736	21	253	52.504	32.326	107.516	0.577	1.624	0.616	0.907
176	1119	168.776	34	246	52.66	27.056	24.433	0.708	1.946	0.514	0.913
177	1422	201.682	50	255	55.41	32.676	138.362	0.569	1.696	0.59	0.888
178	1698	134.383	29	231	85.831	25.189	171.605	0.542	3.408	0.293	0.854
179	530	137.56	42	218	28.862	23.381	2.24	0.895	1.234	0.81	0.964
180	911	108.609	16	183	40.963	28.316	138.605	0.748	1.447	0.691	0.869
181	620	144.01	24	237	33.293	23.711	25.139	0.891	1.404	0.712	0.934
182	269	190.628	73	247	22.932	14.935	168.69	0.809	1.535	0.651	0.934
183	502	171.44	19	253	34.502	18.525	88.168	0.759	1.862	0.537	0.906
184	2193	166.328	20	255	84.813	32.922	22.131	0.532	2.576	0.388	0.75
185	1132	160.734	35	228	46.864	30.755	127.484	0.571	1.524	0.656	0.914
186	388	155.652	39	223	23.536	20.99	147.604	0.674	1.121	0.892	0.928
187	167	198.353	80	225	14.892	14.278	22.003	0.825	1.043	0.959	0.898
188	205	109.868	32	225	18.263	14.292	57.531	0.872	1.278	0.783	0.932
189	603	169.715	39	241	39.047	19.662	145.79	0.499	1.986	0.504	0.903
190	3092	153.135	16	245	81.336	48.402	178.751	0.704	1.68	0.595	0.874
191	227	184.868	50	249	19.133	15.106	160.295	0.629	1.267	0.79	0.901
192	1135	142.473	26	227	43.669	33.093	131.228	0.734	1.32	0.758	0.911
193	742	164.714	51	227	34.83	27.125	68.508	0.735	1.284	0.779	0.93
194	1908	144.076	19	229	70.08	34.665	3.155	0.69	2.022	0.495	0.897
195	5213	185.894	31	255	96.135	69.042	145.994	0.846	1.392	0.718	0.963
196	17420	150.751	13	250	281.567	78.773	6.477	0.449	3.574	0.28	0.773
197	3105	154.47	18	251	93.569	42.251	152.61	0.672	2.215	0.452	0.894
198	5313	151.982	20	254	91.019	74.322	175.095	0.636	1.225	0.817	0.847
199	3298	148.399	15	251	83.154	50.499	1.705	0.771	1.647	0.607	0.933
200	4162	175.578	20	255	110.573	47.925	22.206	0.537	2.307	0.433	0.822
201	5458	183.501	20	255	101.6	68.399	21.498	0.805	1.485	0.673	0.924
202	315	174.867	53	251	27.934	14.358	118.91	0.714	1.946	0.514	0.842
203	652	169.451	42	249	42.845	19.376	158.315	0.655	2.211	0.452	0.881
204	1407	162.716	38	250	73.418	24.401	90.733	0.518	3.009	0.332	0.891
205	2383	148.137	13	255	89.592	33.866	157.344	0.627	2.645	0.378	0.875
206	560	140.093	22	233	39.418	18.089	0.32	0.686	2.179	0.459	0.895
207	1194	182.134	25	255	51.534	29.5	21.988	0.737	1.747	0.572	0.9
208	613	165.6	47	243	34.812	22.42	156.547	0.772	1.553	0.644	0.904
209	459	127.198	14	247	34.973	16.711	127.42	0.58	2.093	0.478	0.879
210	5355	152.562	16	253	119.042	57.275	162.035	0.693	2.078	0.481	0.914
211	1313	160.517	28	248	51.154	32.681	128.262	0.672	1.565	0.639	0.872
212	15280	138.68	20	227	212.427	91.585	174.826	0.629	2.319	0.431	0.879
213	729	172.963	45	230	42.512	21.834	163.864	0.746	1.947	0.514	0.891
214	5207	151.741	26	227	91.464	72.485	173.034	0.779	1.262	0.792	0.897
215	896	139.023	39	215	51.381	22.203	15.508	0.365	2.314	0.432	0.67
216	15767	120.039	25	243	214.033	93.795	172.49	0.216	2.282	0.438	0.578
217	3046	136.827	7	247	68.137	56.919	125.309	0.775	1.197	0.835	0.931
218	276	165.225	43	248	24.653	14.255	36.781	0.722	1.729	0.578	0.885
219	1263	154.264	38	239	53.356	30.139	15.866	0.756	1.77	0.565	0.926
220	257	146.903	61	228	29.202	11.206	20.514	0.612	2.606	0.384	0.793
221	937	166.49	12	243	36.537	32.652	14.617	0.856	1.119	0.894	0.948
222	341	179.422	22	232	22.167	19.587	122.23	0.911	1.132	0.884	0.927
223	285	127.723	52	234	30.815	11.776	19.952	0.67	2.617	0.382	0.853
224	353	134.428	17	239	25.722	17.473	125.751	0.688	1.472	0.679	0.833
225	196	196.413	66	240	19.085	13.076	163.39	0.748	1.46	0.685	0.883
226	5535	147.048	14	250	96.153	73.294	39.779	0.545	1.312	0.762	0.785
227	8154	148.983	16	237	117.756	88.165	8.419	0.719	1.336	0.749	0.892
228	3333	173.915	22	255	105.555	40.204	167.347	0.586	2.625	0.381	0.873
229	2279	191.323	32	255	116.01	25.013	7.582	0.455	4.638	0.216	0.828
230	1041	208.086	56	253	46.786	28.33	167.418	0.835	1.651	0.606	0.943
231	566	146.76	31	247	37.527	19.204	176.847	0.745	1.954	0.512	0.91
232	9370	156.662	12	252	142.593	83.667	175.019	0.755	1.704	0.587	0.968
233	1545	106.005	16	185	61.162	32.163	28.406	0.747	1.902	0.526	0.923
234	30018	140.968	9	255	372.724	102.543	20.501	0.31	3.635	0.275	0.7
235	9526	147.547	13	254	121.322	99.972	174.078	0.784	1.214	0.824	0.911
236	1008	187.815	17	255	44.425	28.89	56.874	0.773	1.538	0.65	0.898
237	394	192.393	36	247	27.836	18.022	92.39	0.721	1.545	0.647	0.904
238	1350	167.204	18	251	56.215	30.577	174.008	0.624	1.838	0.544	0.863
239	235	223.251	105	249	24.225	12.351	64.844	0.445	1.961	0.51	0.778
240	518	200.902	64	246	38.817	16.991	39.632	0.591	2.285	0.438	0.804
241	212	213.387	102	246	17.555	15.376	66.303	0.739	1.142	0.876	0.835
242	1553	139.855	13	254	60.855	32.493	2.069	0.73	1.873	0.534	0.871
243	32894	131.104	19	224	247.306	169.353	152.643	0.3	1.46	0.685	0.63
244	3551	156.863	33	233	101.064	44.737	106.004	0.596	2.259	0.443	0.887
245	2374	133.915	26	216	66.72	45.304	19.935	0.811	1.473	0.679	0.944
246	26127	154.906	13	255	256.809	129.536	32.45	0.432	1.983	0.504	0.73
247	4636	148.312	21	254	152.934	38.597	173.4	0.482	3.962	0.252	0.843
248	405	158.516	28	231	33.561	15.365	169.523	0.664	2.184	0.458	0.873
249	10983	137.987	8	254	136.027	102.803	45.507	0.554	1.323	0.756	0.792
250	1927	165.196	16	253	76.448	32.094	20.996	0.553	2.382	0.42	0.792
251	1532	124.116	10	237	59.195	32.952	166.985	0.747	1.796	0.557	0.902
252	482	192.371	31	232	26.555	23.111	39.848	0.806	1.149	0.87	0.927
253	4804	171.579	26	251	100.107	61.101	152.603	0.549	1.638	0.61	0.907
254	1102	141.112	22	254	53.089	26.429	133.298	0.781	2.009	0.498	0.929
255	6166	152.628	12	250	116.268	67.523	10.89	0.778	1.722	0.581	0.976
256	783	152.769	20	235	39.626	25.159	130.085	0.864	1.575	0.635	0.943
257	835	118.746	27	248	40.721	26.108	9.078	0.904	1.56	0.641	0.969
258	3943	116.597	18	225	84.308	59.548	160.864	0.805	1.416	0.706	0.947
259	16521	115.699	16	247	161.679	130.105	109.254	0.546	1.243	0.805	0.775
260	7267	93.357	12	237	138.637	66.74	9.128	0.748	2.077	0.481	0.928
261	6138	121.538	10	230	118.609	65.89	33.55	0.619	1.8	0.556	0.873
262	1312	120.84	26	205	44.753	37.327	147.915	0.855	1.199	0.834	0.943
263	2877	117.808	19	192	75.17	48.731	39.427	0.77	1.543	0.648	0.947
264	4567	108.241	14	207	118.19	49.199	6.377	0.569	2.402	0.416	0.786
265	1157	114.991	17	211	54.625	26.968	166.13	0.777	2.025	0.494	0.936
266	3023	123.683	21	190	95.451	40.324	175.711	0.725	2.367	0.422	0.957
267	2224	107.24	6	248	85.491	33.123	2.415	0.454	2.581	0.387	0.928
268	586	156.753	18	239	28.246	26.415	5.459	0.886	1.069	0.935	0.936
269	199	146.96	23	229	20.125	12.59	168.358	0.892	1.598	0.626	0.995
270	698	111.325	23	205	33.15	26.809	75.775	0.825	1.237	0.809	0.888
271	1570	123.499	22	199	57.832	34.565	179.956	0.837	1.673	0.598	0.935
272	7373	133.1	20	215	104.35	89.963	0.323	0.822	1.16	0.862	0.928
273	1019	145.149	23	206	52.356	24.781	18.558	0.751	2.113	0.473	0.921
274	309	156.887	47	207	26.447	14.876	145.845	0.552	1.778	0.563	0.776
275	2534	183.905	36	254	73.745	43.751	4.641	0.79	1.686	0.593	0.978
276	1465	172.844	16	248	59.237	31.489	72.419	0.716	1.881	0.532	0.887
277	1410	136.406	11	234	56.004	32.056	11.755	0.645	1.747	0.572	0.95
278	6876	152.488	10	241	141.992	61.657	28.545	0.659	2.303	0.434	0.964
279	3788	101.093	7	251	83.665	57.647	23.615	0.806	1.451	0.689	0.934
280	3262	190.683	21	255	133.78	31.046	8.979	0.502	4.309	0.232	0.927
281	2647	170.598	28	255	64.01	52.652	80.507	0.759	1.216	0.823	0.902
282	474	198.074	65	252	30.255	19.948	151.127	0.76	1.517	0.659	0.901
283	315	138.498	32	244	23.342	17.182	173.505	0.916	1.359	0.736	0.991
284	1276	158.017	23	239	67.148	24.195	1.287	0.528	2.775	0.36	0.752
285	691	148.495	19	210	34.791	25.288	1.491	0.715	1.376	0.727	0.979
286	2559	140.69	9	255	60.805	53.584	8.473	0.87	1.135	0.881	0.929
287	864	164.858	33	245	41.757	26.345	147.818	0.775	1.585	0.631	0.917
288	255	149.267	29	247	30.944	10.492	47.272	0.575	2.949	0.339	0.782
289	410	167.244	43	236	25.656	20.348	25.418	0.899	1.261	0.793	0.94
290	315	119.857	24	254	21.127	18.984	93.224	0.92	1.113	0.899	0.972
291	421	156.736	54	240	40.748	13.155	112.156	0.538	3.098	0.323	0.825
292	485	160.054	22	240	26.731	23.101	148.739	0.671	1.157	0.864	0.833
293	271	145.469	28	213	26.54	13.001	83.296	0.814	2.041	0.49	0.968
294	8103	168.38	9	255	112.972	91.324	132.659	0.7	1.237	0.808	0.891
295	720	158.282	19	250	36.245	25.293	2.633	0.885	1.433	0.698	0.978
296	250	180.156	51	235	19.68	16.175	112.654	0.927	1.217	0.822	0.962
297	2315	178.428	27	254	92.826	31.754	10.476	0.583	2.923	0.342	0.831
298	4768	141.2	9	247	80.266	75.633	98.09	0.838	1.061	0.942	0.934
299	3995	167.594	15	247	91.343	55.687	175.628	0.77	1.64	0.61	0.911
300	1630	140.275	28	211	67.041	30.957	58.443	0.696	2.166	0.462	0.879
301	4400	148.465	29	219	94.475	59.299	23.661	0.826	1.593	0.628	0.954
302	19305	136.047	24	244	198.542	123.802	32.486	0.514	1.604	0.624	0.796
303	1089	184.541	39	254	38.948	35.6	136.866	0.893	1.094	0.914	0.96
304	915	163.707	28	254	46.373	25.123	156.285	0.701	1.846	0.542	0.888
305	418	191.151	69	243	23.739	22.419	9.946	0.961	1.059	0.944	0.959
306	5020	169.588	23	254	160.646	39.787	0.806	0.399	4.038	0.248	0.742
307	720	144.322	37	250	42.809	21.414	12.109	0.759	1.999	0.5	0.907
308	909	195.404	27	254	41.276	28.04	126.971	0.861	1.472	0.679	0.949
309	4109	147.926	17	248	89.016	58.773	176.148	0.808	1.515	0.66	0.952
310	330	159.3	70	234	27.593	15.228	62.081	0.769	1.812	0.552	0.882
311	2925	115.156	15	247	72.961	51.044	86.759	0.653	1.429	0.7	0.924
312	2691	137.091	15	245	88.25	38.825	86.725	0.679	2.273	0.44	0.952
313	6353	146.388	16	249	100.41	80.558	87.599	0.685	1.246	0.802	0.883
314	11457	113.253	10	250	168.761	86.439	28.314	0.337	1.952	0.512	0.619
315	1934	62.738	7	234	51.749	47.585	61.436	0.907	1.088	0.92	0.958
316	3069	106.587	10	247	65.73	59.449	17.866	0.947	1.106	0.904	0.977
317	474	163.076	43	249	26.937	22.405	130.257	0.587	1.202	0.832	0.919
318	1246	103.568	8	233	52.174	30.407	5.822	0.721	1.716	0.583	0.907
319	6710	158.543	16	252	110.515	77.306	19.033	0.813	1.43	0.7	0.926
320	410	179.42	46	240	24.908	20.958	150.062	0.899	1.188	0.841	0.99
321	763	168.439	39	233	43.539	22.313	174.437	0.761	1.951	0.512	0.908
322	1246	171.431	31	248	51.799	30.627	12.298	0.81	1.691	0.591	0.938
323	1918	146.407	22	237	63.052	38.731	12.422	0.817	1.628	0.614	0.927
324	320	123.297	16	247	26.952	15.117	46.444	0.836	1.783	0.561	0.914
325	822	99.856	12	242	40.356	25.934	155.639	0.7	1.556	0.643	0.856
326	645	123.45	23	210	39.244	20.926	173.942	0.723	1.875	0.533	0.842
327	2113	194.106	35	247	72.232	37.246	159.35	0.796	1.939	0.516	0.937
328	3959	180.01	24	253	79.853	63.125	2.491	0.909	1.265	0.791	0.968
329	3483	160.743	33	224	113.838	38.956	18.687	0.591	2.922	0.342	0.849
330	252	157.544	49	235	22.917	14.001	66.913	0.831	1.637	0.611	0.887
331	169	164.645	66	215	20.095	10.708	88.188	0.733	1.877	0.533	0.871
332	244	139.721	37	226	27.681	11.223	90.721	0.732	2.466	0.405	0.924
333	750	173.919	34	240	33.007	28.931	86.286	0.851	1.141	0.877	0.908
334	1724	189.592	34	252	58.325	37.635	151.182	0.712	1.55	0.645	0.93
335	2194	169.301	22	236	69.54	40.171	161.344	0.802	1.731	0.578	0.932
336	441	184.104	34	241	24.557	22.865	69.923	0.951	1.074	0.931	0.955
337	316	175.354	59	245	25.53	15.76	1.336	0.818	1.62	0.617	0.946
338	899	153.605	39	244	56.311	20.327	45.025	0.578	2.77	0.361	0.804
339	22680	133.608	17	251	327.927	88.06	9.266	0.245	3.724	0.269	0.569
340	3143	139.549	29	201	68.733	58.222	53.994	0.843	1.181	0.847	0.923
341	8514	133.31	27	234	113.948	95.134	168.595	0.699	1.198	0.835	0.869
342	3801	175.711	9	252	92.901	52.094	9.623	0.791	1.783	0.561	0.957
343	207	166.681	19	231	19.777	13.327	163.328	0.59	1.484	0.674	0.908
344	472	135.256	27	231	31.414	19.131	154.214	0.87	1.642	0.609	0.967
345	2793	154.433	11	253	60.778	58.51	104.851	0.871	1.039	0.963	0.938
346	4532	127.597	12	241	104.864	55.027	2.6	0.469	1.906	0.525	0.762
347	4131	154.507	26	219	85.358	61.62	59.768	0.905	1.385	0.722	0.978
348	1511	144.405	32	232	57.008	33.747	41.112	0.773	1.689	0.592	0.924
349	2002	163.52	22	239	58.754	43.385	20.087	0.761	1.354	0.738	0.883
350	2151	174.306	40	237	62.872	43.561	9.842	0.728	1.443	0.693	0.927
351	1335	193.299	58	254	56.075	30.313	177.416	0.763	1.85	0.541	0.911
352	2673	181.518	14	252	70.131	48.529	51.884	0.765	1.445	0.692	0.888
353	156	183.083	60	233	17.762	11.183	101.937	0.849	1.588	0.63	0.907
354	288	163.16	58	211	26.37	13.906	56.003	0.783	1.896	0.527	0.867
355	857	169.019	56	225	39.665	27.509	58.158	0.835	1.442	0.694	0.927
356	7485	158.376	25	239	121.362	78.527	40.645	0.784	1.545	0.647	0.926
357	3511	134.068	22	244	110.597	40.42	26.099	0.571	2.736	0.365	0.893
358	1550	146.605	31	220	64.706	30.5	154.349	0.674	2.122	0.471	0.826
359	5982	171.954	19	255	156.531	48.658	15.009	0.414	3.217	0.311	0.71
360	3531	143.441	15	253	112.672	39.902	176.435	0.563	2.824	0.354	0.858
361	3154	167.179	18	255	89.189	45.026	150.372	0.714	1.981	0.505	0.941
362	573	178.426	50	251	31.939	22.842	175.467	0.862	1.398	0.715	0.93
363	563	164.496	39	254	32.809	21.849	158.373	0.833	1.502	0.666	0.957
364	3741	150.053	22	248	98.715	48.252	30.827	0.67	2.046	0.489	0.876
365	491	141.418	45	229	33.268	18.792	26.971	0.734	1.77	0.565	0.886
366	985	198.204	42	253	56.025	22.385	0.595	0.625	2.503	0.4	0.86
367	14009	159.018	14	254	307.574	57.992	177.725	0.315	5.304	0.189	0.696
368	5279	133.681	24	205	88.057	76.33	152.93	0.655	1.154	0.867	0.835
369	1006	169.823	16	243	44.624	28.704	77.327	0.841	1.555	0.643	0.925
370	275	179.6	72	235	23.492	14.905	86.998	0.899	1.576	0.634	0.982
371	384	156.169	42	244	28.651	17.065	163.636	0.833	1.679	0.596	0.932
372	749	151.386	28	210	34.226	27.863	82.815	0.928	1.228	0.814	0.973
373	1203	133.497	26	218	50.773	30.168	7.306	0.853	1.683	0.594	0.962
374	2256	140.059	9	244	66.94	42.911	166.776	0.825	1.56	0.641	0.927
375	1177	174.975	22	251	51.716	28.978	98.577	0.81	1.785	0.56	0.939
376	1674	190.436	35	253	63.945	33.332	161.958	0.754	1.918	0.521	0.925
377	833	172.444	44	250	34.286	30.934	13.341	0.89	1.108	0.902	0.96
378	5174	161.743	18	251	98.51	66.874	175.676	0.698	1.473	0.679	0.854
379	486	155.938	28	225	29.294	21.123	141.878	0.925	1.387	0.721	0.949
380	854	151.768	31	234	43.409	25.049	133.818	0.829	1.733	0.577	0.932
381	1205	182.255	45	245	56.934	26.948	179.385	0.645	2.113	0.473	0.857
382	378	180.045	55	235	25.745	18.694	166.253	0.836	1.377	0.726	0.95
383	312	185.099	39	250	21.356	18.601	103.109	0.845	1.148	0.871	0.963
384	286	182.535	67	244	22.47	16.206	98.685	0.884	1.386	0.721	0.947
385	558	187.634	67	245	32.053	22.165	86.585	0.855	1.446	0.692	0.921
386	1416	190.287	32	249	51.342	35.115	90.065	0.831	1.462	0.684	0.932
387	852	159.894	36	242	39.52	27.45	148.162	0.798	1.44	0.695	0.914
388	1264	168.624	31	233	51.47	31.268	156.308	0.668	1.646	0.608	0.862
389	606	142.226	13	226	40.368	19.114	153.284	0.695	2.112	0.473	0.842
390	8391	175.584	15	255	142.591	74.926	19.869	0.669	1.903	0.525	0.868
391	1151	154.487	16	248	54.068	27.105	150.029	0.486	1.995	0.501	0.704
392	198	195.515	73	240	17.39	14.497	3.852	0.877	1.2	0.834	0.952
393	460	142.917	13	238	28.58	20.493	136.516	0.841	1.395	0.717	0.916
394	1128	203.138	68	255	58.84	24.409	6.727	0.685	2.411	0.415	0.91
395	430	168.437	86	244	29.603	18.494	163.17	0.794	1.601	0.625	0.931
396	37495	143.682	13	254	284.644	167.719	175.032	0.338	1.697	0.589	0.663
397	1702	184.824	31	242	55.918	38.754	25.764	0.82	1.443	0.693	0.926
398	1594	158.614	17	240	51.015	39.783	165.536	0.863	1.282	0.78	0.959
399	3374	152.31	19	255	82.738	51.922	11.933	0.795	1.594	0.628	0.931
400	4173	158.688	22	255	88.298	60.174	172.367	0.751	1.467	0.681	0.912
401	457	192.295	68	254	28.4	20.488	152.245	0.817	1.386	0.721	0.914
402	886	178.237	30	252	47.606	23.696	22.258	0.664	2.009	0.498	0.844
403	782	174.754	47	220	41.382	24.061	142.272	0.764	1.72	0.581	0.914
404	564	183.796	31	252	31.391	22.876	70.453	0.857	1.372	0.729	0.922
405	257	181.576	47	253	22.325	14.657	15.867	0.826	1.523	0.657	0.88
406	557	142.82	33	240	32.786	21.631	5.869	0.821	1.516	0.66	0.922
407	2916	169.456	31	248	63.43	58.533	144.933	0.812	1.084	0.923	0.94
408	818	184.285	60	252	39.661	26.26	19.013	0.605	1.51	0.662	0.872
409	5233	119.329	16	209	119.622	55.699	16.004	0.614	2.148	0.466	0.858
410	3089	117.646	21	217	71.994	54.63	91.898	0.779	1.318	0.759	0.938
411	696	150.721	38	202	35.971	24.636	110.301	0.864	1.46	0.685	0.906
412	2071	161.267	22	243	66.03	39.934	31.064	0.635	1.653	0.605	0.839
413	8141	150.931	25	213	129.778	79.871	170.616	0.778	1.625	0.615	0.926
414	891	189.976	36	242	39.852	28.467	74.788	0.794	1.4	0.714	0.917
415	3019	153.859	22	237	78.607	48.9	178.509	0.732	1.608	0.622	0.881
416	6365	149.303	8	244	97.201	83.376	24.299	0.756	1.166	0.858	0.891
417	5376	126.673	13	243	97.468	70.228	14.861	0.778	1.388	0.721	0.913
418	3033	156.66	13	248	83.612	46.186	70.169	0.753	1.81	0.552	0.908
419	163	178.859	61	227	16.672	12.448	98.806	0.865	1.339	0.747	0.916
420	115	179.922	63	221	16.988	8.619	159.308	0.71	1.971	0.507	0.927
421	444	169.428	51	243	25.73	21.971	144.886	0.937	1.171	0.854	0.953
422	1082	184.346	42	246	45.204	30.476	37.723	0.886	1.483	0.674	0.938
423	168	179.881	56	232	20.305	10.535	7.901	0.365	1.927	0.519	0.712
424	2726	144.289	16	244	80.365	43.188	114.277	0.5	1.861	0.537	0.746
425	662	143.651	14	236	37.605	22.414	170.03	0.734	1.678	0.596	0.917
426	946	121.522	19	209	51.396	23.435	35.434	0.616	2.193	0.456	0.836
427	208	216.827	82	251	24.575	10.777	94.409	0.749	2.28	0.439	0.937
428	38522	151.916	10	250	264.934	185.132	94.898	0.612	1.431	0.699	0.859
429	89	194.539	58	238	29.102	3.894	58.761	0.331	7.474	0.134	0.73
430	1160	136.514	13	249	43.941	33.612	20.125	0.904	1.307	0.765	0.988
431	446	193.388	40	241	29.128	19.495	167.174	0.901	1.494	0.669	0.945
432	812	178.57	28	252	41.636	24.831	116.349	0.748	1.677	0.596	0.933
433	274	156.004	43	250	24.889	14.017	147.721	0.81	1.776	0.563	0.926
434	181	182.215	56	243	19.152	12.033	114.321	0.66	1.592	0.628	0.896
435	1235	167.56	20	246	45.94	34.228	128.592	0.8	1.342	0.745	0.9
436	786	207.207	45	253	34.033	29.406	22.199	0.79	1.157	0.864	0.912
437	1579	163.545	22	245	49.22	40.846	80.638	0.701	1.205	0.83	0.971
438	749	145.977	28	200	39.462	24.166	144.901	0.616	1.633	0.612	0.832
439	324	139.188	19	250	22.899	18.015	116.813	0.914	1.271	0.787	0.947
440	770	181.169	36	233	43.727	22.421	139.779	0.797	1.95	0.513	0.934
441	977	189.106	57	237	48.024	25.903	117.067	0.608	1.854	0.539	0.896
442	393	174.356	38	228	26.621	18.796	123.384	0.88	1.416	0.706	0.94
443	358	169.209	58	228	26.338	17.306	130.287	0.879	1.522	0.657	0.923
444	672	161.735	30	239	37.455	22.844	124.866	0.836	1.64	0.61	0.906
445	637	120.4	31	221	39.992	20.28	123.493	0.596	1.972	0.507	0.796
446	5170	167.285	21	254	98.803	66.624	37.774	0.714	1.483	0.674	0.908
447	1425	156.328	29	253	68.627	26.438	63.071	0.602	2.596	0.385	0.892
448	1650	167.025	41	240	67.977	30.905	18.78	0.633	2.2	0.455	0.807
449	611	159.561	25	237	34.997	22.229	61.565	0.859	1.574	0.635	0.931
450	881	187.587	40	251	57.912	19.37	167.314	0.447	2.99	0.334	0.785
451	6905	130.87	17	255	101.594	86.538	173.389	0.351	1.174	0.852	0.648
452	4660	158.495	21	254	83.713	70.876	139.16	0.305	1.181	0.847	0.767
453	455	174.299	27	250	32.241	17.969	31.122	0.842	1.794	0.557	0.906
454	25818	146.798	10	255	267.81	122.746	166.452	0.242	2.182	0.458	0.615
455	697	143.651	37	249	47.411	18.718	23.246	0.416	2.533	0.395	0.628
456	792	157.927	20	245	41.061	24.558	114.592	0.815	1.672	0.598	0.917
457	814	149.041	46	255	35.819	28.934	14.077	0.847	1.238	0.808	0.942
458	1069	157.124	30	255	41.727	32.619	8.803	0.778	1.279	0.782	0.873
459	2044	175.571	17	241	61.028	42.645	65.79	0.678	1.431	0.699	0.881
460	410	177.878	43	238	33.063	15.789	47.844	0.48	2.094	0.478	0.779
461	4275	167.564	14	251	80.882	67.297	32.281	0.845	1.202	0.832	0.936
462	397	182.909	53	242	28.648	17.645	81.394	0.779	1.624	0.616	0.902
463	1098	147.466	14	246	55.006	25.416	173.284	0.453	2.164	0.462	0.863
464	3463	179.032	20	253	106.945	41.229	13.792	0.445	2.594	0.386	0.756
465	1074	168.719	25	245	47.325	28.895	49.314	0.814	1.638	0.611	0.94
466	362	175.097	52	238	24.396	18.893	163.105	0.872	1.291	0.774	0.892
467	580	123.672	24	187	31.056	23.779	101.217	0.813	1.306	0.766	0.929
468	554	153.509	44	222	37.392	18.864	146.764	0.658	1.982	0.505	0.812
469	7928	143.706	8	253	154.471	65.347	160.174	0.552	2.364	0.423	0.864
470	3875	129.197	12	241	106.428	46.358	4.651	0.639	2.296	0.436	0.874
471	5886	145.014	20	252	163.668	45.79	16.278	0.376	3.574	0.28	0.645
472	288	213.993	67	253	27.268	13.448	159.124	0.786	2.028	0.493	0.917
473	5431	140.377	20	223	134.771	51.309	146.066	0.599	2.627	0.381	0.843
474	394	171.525	56	231	28.207	17.785	114.78	0.669	1.586	0.63	0.817
475	294	212.738	77	247	23.49	15.936	97.283	0.55	1.474	0.678	0.795
476	582	151.423	46	247	30.25	24.497	59.828	0.83	1.235	0.81	0.964
477	6628	155.948	10	248	154.349	54.675	173.671	0.562	2.823	0.354	0.863
478	1453	173.128	17	250	51.411	35.985	72.4	0.913	1.429	0.7	0.966
479	394	119.629	40	185	26.407	18.997	8.094	0.742	1.39	0.719	0.908
480	204	164.137	53	214	18.204	14.268	54.121	0.704	1.276	0.784	0.903
481	8623	112.693	10	243	145.408	75.506	29.747	0.375	1.926	0.519	0.658
482	1039	171.567	39	247	45.359	29.165	48.745	0.681	1.555	0.643	0.809
483	2221	163.055	22	252	81.201	34.825	55.34	0.554	2.332	0.429	0.788
484	4179	158.388	11	241	91.217	58.332	171.057	0.772	1.564	0.639	0.906
485	613	111.948	45	182	42.523	18.355	13.045	0.697	2.317	0.432	0.891
486	3089	133.758	24	213	69.782	56.361	143.007	0.829	1.238	0.808	0.946
487	241	196.905	101	252	23.38	13.124	108.328	0.695	1.781	0.561	0.825
488	1975	154.479	23	251	83.705	30.042	104.277	0.606	2.786	0.359	0.913
489	7768	146.832	21	253	113.145	87.414	0.333	0.633	1.294	0.773	0.842
490	611	156.34	33	225	33.446	23.26	179.761	0.899	1.438	0.695	0.955
491	5585	153.156	21	254	88.021	80.788	173.27	0.636	1.09	0.918	0.847
492	10225	149.356	14	254	209.807	62.052	161.123	0.286	3.381	0.296	0.589
493	14293	149.485	11	254	161.644	112.584	134.693	0.416	1.436	0.696	0.788
494	1747	154.784	14	252	49.912	44.565	123.829	0.721	1.12	0.893	0.9
495	1572	136.99	13	246	68.345	29.286	127.311	0.651	2.334	0.428	0.901
496	929	173.145	33	252	40.257	29.382	154.424	0.849	1.37	0.73	0.94
497	773	146.468	45	234	47.342	20.789	137.895	0.54	2.277	0.439	0.822
498	8230	143.46	17	250	144.292	72.622	176.716	0.611	1.987	0.503	0.819
499	3203	142.698	20	238	79.257	51.455	9.502	0.66	1.54	0.649	0.83
500	951	160.62	28	245	40.959	29.562	128.968	0.845	1.386	0.722	0.951
501	2668	112.409	13	247	88.129	38.546	175.541	0.72	2.286	0.437	0.92
502	3771	142.714	9	236	99.475	48.267	177.234	0.524	2.061	0.485	0.887
503	7505	168.322	24	255	115.477	82.749	153.472	0.509	1.396	0.717	0.776
504	241	190.68	58	252	22.809	13.453	22.793	0.896	1.696	0.59	0.927
505	72	183.25	76	239	13.363	6.86	13.223	0.299	1.948	0.513	0.621
506	7303	152.915	21	254	142.071	65.449	168.752	0.25	2.171	0.461	0.593
507	55065	142.981	11	254	363.589	192.83	22.811	0.219	1.886	0.53	0.609
508	14149	115.497	9	250	175.25	102.796	95.921	0.357	1.705	0.587	0.616
509	192	181.479	66	239	22.394	10.916	64.126	0.608	2.051	0.487	0.85
510	882	137.982	28	243	42.183	26.622	163.452	0.825	1.585	0.631	0.942
511	571	174.103	40	240	29.098	24.985	39.001	0.899	1.165	0.859	0.955
512	769	149.519	22	233	40.821	23.986	140.499	0.833	1.702	0.588	0.947
513	675	142.03	21	240	33.031	26.019	110.518	0.881	1.27	0.788	0.917
514	3027	131.717	11	253	99.889	38.584	51.63	0.622	2.589	0.386	0.843
515	5351	136.901	10	254	104.425	65.244	139.11	0.796	1.601	0.625	0.918
516	2180	128.328	8	247	76.375	36.343	125.414	0.534	2.102	0.476	0.739
517	958	111.768	15	228	44.845	27.2	18.06	0.735	1.649	0.607	0.845
518	1286	153.009	18	253	55.207	29.659	108.994	0.796	1.861	0.537	0.946
519	1604	159.963	26	245	77.743	26.269	8.392	0.657	2.959	0.338	0.895
520	264	157.102	26	249	20.543	16.363	44.489	0.957	1.255	0.797	0.985
521	2655	167.43	17	251	92.387	36.59	13.786	0.546	2.525	0.396	0.881
522	3732	183.107	44	254	82.439	57.639	50.852	0.842	1.43	0.699	0.971
523	1296	178.213	46	244	49.351	33.436	139.117	0.83	1.476	0.678	0.908
524	447	191.371	66	252	26.637	21.367	68.175	0.866	1.247	0.802	0.92
525	4466	167.118	19	255	90.575	62.78	100.354	0.61	1.443	0.693	0.851
526	3481	145.817	24	241	106.818	41.493	20.761	0.525	2.574	0.388	0.798
527	378	166.159	32	254	28.383	16.957	167.168	0.878	1.674	0.597	0.959
528	650	169.092	57	230	39.478	20.964	13.554	0.625	1.883	0.531	0.89
529	1449	176.028	27	245	50.283	36.691	127.003	0.869	1.37	0.73	0.945
530	6715	187.972	31	253	129.878	65.83	169.428	0.705	1.973	0.507	0.892
531	5986	137.236	27	212	146.354	52.076	167.335	0.473	2.81	0.356	0.811
532	1978	167.395	54	224	54.043	46.602	109.589	0.821	1.16	0.862	0.937
533	2654	151.613	28	228	89.864	37.603	11.168	0.639	2.39	0.418	0.919
534	1472	158.616	35	227	56.502	33.171	12.779	0.787	1.703	0.587	0.906
535	1956	181.045	56	255	90.291	27.582	179.227	0.603	3.274	0.305	0.961
536	3858	168.135	22	247	133.085	36.91	5.569	0.396	3.606	0.277	0.708
537	240	174.283	39	242	22.392	13.647	40.262	0.844	1.641	0.609	0.923
538	416	172.5	47	249	25.042	21.151	157.052	0.766	1.184	0.845	0.856
539	11103	190.527	19	251	124.849	113.231	64.339	0.893	1.103	0.907	0.954
540	2251	162.55	19	235	61.014	46.974	151.647	0.746	1.299	0.77	0.857
541	957	123.018	13	232	56.856	21.431	147.051	0.639	2.653	0.377	0.915
542	717	166.632	67	210	33.616	27.157	130.243	0.877	1.238	0.808	0.941
543	1540	178.362	37	251	77.551	25.284	13.383	0.635	3.067	0.326	0.924
544	1086	178.955	33	236	43.917	31.485	72.444	0.823	1.395	0.717	0.911
545	2588	153.927	23	243	79.709	41.34	128.378	0.568	1.928	0.519	0.786
546	498	157.175	67	229	38.354	16.532	85.435	0.694	2.32	0.431	0.933
547	2417	131.163	10	254	111.277	27.655	170.298	0.447	4.024	0.249	0.801
548	735	192.359	59	252	44.02	21.259	42.571	0.688	2.071	0.483	0.843
549	237	176.747	60	239	22.093	13.658	104.547	0.818	1.618	0.618	0.905
550	289	139.962	44	224	20.741	17.741	44.454	0.856	1.169	0.855	0.903
551	3931	150.059	14	236	156.02	32.08	173.233	0.297	4.863	0.206	0.714
552	2161	156.926	16	249	63.172	43.556	10.208	0.703	1.45	0.689	0.849
553	1378	165.65	29	231	56.631	30.982	168.501	0.688	1.828	0.547	0.887
554	697	190.438	56	255	32.592	27.229	35.572	0.925	1.197	0.835	0.937
555	2540	152.646	23	240	71.195	45.425	14.179	0.826	1.567	0.638	0.957
556	1209	116.184	8	242	57.151	26.935	86.228	0.679	2.122	0.471	0.861
557	11943	167.201	12	253	162.364	93.656	163.598	0.514	1.734	0.577	0.798
558	4829	162.813	12	255	110.758	55.513	177.079	0.712	1.995	0.501	0.925
559	3026	134.964	26	227	83.185	46.316	11.728	0.741	1.796	0.557	0.903
560	11027	159.577	22	253	184.452	76.117	160.895	0.564	2.423	0.413	0.847
561	3673	155.925	16	246	96.644	48.39	4.167	0.704	1.997	0.501	0.899
562	43985	146.382	6	255	354.521	157.969	148.006	0.383	2.244	0.446	0.777
563	910	129.644	52	212	38.03	30.467	0.14	0.822	1.248	0.801	0.946
564	2959	162.244	27	223	73.364	51.353	156.558	0.779	1.429	0.7	0.91
565	5692	171.041	18	251	107.074	67.685	174.157	0.723	1.582	0.632	0.878
566	512	156.961	27	246	32.888	19.822	24.487	0.852	1.659	0.603	0.928
567	2001	182.245	27	253	62.789	40.577	153.711	0.798	1.547	0.646	0.956
568	915	199.608	58	252	41.085	28.356	110.141	0.86	1.449	0.69	0.961
569	15282	164.865	18	254	156.151	124.608	104.674	0.753	1.253	0.798	0.915
570	3212	166.851	44	228	70.37	58.116	133.875	0.881	1.211	0.826	0.946
571	405	144.111	24	219	27.09	19.035	109.618	0.795	1.423	0.703	0.951
572	1178	116.533	26	200	59.058	25.397	22.056	0.576	2.325	0.43	0.765
573	1246	172.742	26	236	55.678	28.493	173.958	0.756	1.954	0.512	0.922
574	2750	143.319	10	237	66.606	52.569	176.549	0.938	1.267	0.789	0.984
575	1375	176.305	19	245	48.091	36.404	159.263	0.752	1.321	0.757	0.94
576	352	152.173	15	244	23.692	18.917	138.916	0.907	1.252	0.798	0.917
577	1614	178.525	38	251	47.193	43.545	45.582	0.909	1.084	0.923	0.953
578	2968	141.441	22	248	102.299	36.941	0.325	0.556	2.769	0.361	0.879
579	6092	148.687	15	254	140.674	55.138	26.622	0.532	2.551	0.392	0.765
580	905	169.767	19	248	38.735	29.748	98.94	0.858	1.302	0.768	0.929
581	1030	128.52	24	228	39.41	33.277	178.44	0.954	1.184	0.844	0.987
582	3631	147.559	14	233	71.708	64.472	39.682	0.88	1.112	0.899	0.936
583	423	159.615	31	224	25.593	21.044	166.588	0.94	1.216	0.822	0.961
584	1134	140.191	14	248	43.858	32.921	173.62	0.739	1.332	0.751	0.94
585	855	193.463	48	239	43.782	24.865	3.215	0.581	1.761	0.568	0.85
586	719	139.726	27	238	38.344	23.875	169.604	0.832	1.606	0.623	0.956
587	1350	147.752	13	253	56.57	30.385	172.75	0.743	1.862	0.537	0.898
588	799	146.884	18	249	41.903	24.278	3.446	0.759	1.726	0.579	0.906
589	2750	120.94	10	229	72.77	48.116	22.6	0.61	1.512	0.661	0.836
590	481	184.289	29	254	36.692	16.691	41.78	0.711	2.198	0.455	0.918
591	289	153.948	33	243	31.64	11.63	33.159	0.653	2.721	0.368	0.85
592	1988	170.447	17	237	70.102	36.107	28.121	0.784	1.941	0.515	0.921
593	666	147.604	35	188	31.087	27.277	88.329	0.949	1.14	0.877	0.971
594	4850	142.752	14	242	132.533	46.594	25.463	0.443	2.844	0.352	0.736
595	1250	158.773	29	234	62.813	25.338	178.794	0.708	2.479	0.403	0.931
596	458	151.725	33	251	29.425	19.818	7.934	0.903	1.485	0.673	0.942
597	1939	131.202	14	249	70.974	34.785	22.775	0.659	2.04	0.49	0.831
598	13934	113.84	8	249	152.029	116.697	42.623	0.511	1.303	0.768	0.805
599	746	158.633	28	241	37.256	25.495	1.712	0.865	1.461	0.684	0.928
600	1520	153.328	28	251	60.546	31.965	13.754	0.826	1.894	0.528	0.95
601	848	151.838	36	251	37.128	29.081	32.81	0.874	1.277	0.783	0.97
602	1154	141.59	26	246	49.759	29.528	2.544	0.782	1.685	0.593	0.966
603	479	159.031	48	229	32.681	18.662	166.31	0.72	1.751	0.571	0.925
604	1581	124.169	17	241	52.419	38.402	143.201	0.848	1.365	0.733	0.936
605	663	132.587	28	241	36.773	22.956	51.726	0.822	1.602	0.624	0.913
606	194	133.01	44	240	16.656	14.83	148.672	0.963	1.123	0.89	0.96
607	908	173.752	27	240	43.995	26.278	29.13	0.687	1.674	0.597	0.795
608	442	193.955	62	234	25.809	21.805	140.745	0.95	1.184	0.845	0.965
609	1271	189.895	32	253	46.297	34.954	148.844	0.788	1.325	0.755	0.883
610	902	116.09	18	218	47.303	24.279	167.796	0.733	1.948	0.513	0.886
611	698	145.337	37	239	51.242	17.344	33.477	0.617	2.955	0.338	0.847
612	2341	175.097	45	254	76.266	39.082	4.986	0.736	1.951	0.512	0.908
613	2127	165.737	31	255	58.007	46.687	31.357	0.74	1.242	0.805	0.914
614	4116	208.359	45	255	102.049	51.354	0.527	0.475	1.987	0.503	0.873
615	573	175.656	58	236	28.573	25.533	16.471	0.963	1.119	0.894	0.955
616	1588	183.37	27	236	57.666	35.062	42.256	0.857	1.645	0.608	0.96
617	236	197.047	62	250	21.705	13.844	25.626	0.863	1.568	0.638	0.922
618	357	165.202	28	221	25.198	18.039	7.795	0.88	1.397	0.716	0.935
619	1877	191.294	32	246	75.008	31.862	169.596	0.658	2.354	0.425	0.9
620	290	186.841	42	230	20.194	18.285	105.931	0.968	1.104	0.905	0.973
621	2614	165.593	13	235	100.319	33.177	179.671	0.549	3.024	0.331	0.814
622	1370	149.18	26	209	77.212	22.592	26.413	0.494	3.418	0.293	0.766
623	7750	154.177	27	208	124.87	79.023	0.406	0.797	1.58	0.633	0.92
624	411	174.46	34	245	28.442	18.399	178.105	0.808	1.546	0.647	0.878
625	273	163.897	38	250	22.24	15.629	175.568	0.845	1.423	0.703	0.948
626	10790	187.107	9	253	143.065	96.028	78.488	0.533	1.49	0.671	0.756
627	13295	146.557	22	214	249.778	67.771	179.099	0.314	3.686	0.271	0.738
628	2153	177.869	18	239	91.048	30.108	8.377	0.541	3.024	0.331	0.861
629	4956	193.004	49	247	146.583	43.048	162.558	0.525	3.405	0.294	0.857
630	2985	141.519	16	249	107.49	35.358	37.881	0.536	3.04	0.329	0.849
631	737	173.948	36	247	34.659	27.074	171.876	0.777	1.28	0.781	0.855
632	9320	174.654	15	255	134.641	88.135	171.244	0.802	1.528	0.655	0.924
633	452	147.038	30	226	26.189	21.975	131.836	0.835	1.192	0.839	0.93
634	347	183.87	35	238	24.128	18.311	155.191	0.941	1.318	0.759	0.948
635	617	158.464	61	209	29.938	26.241	135.155	0.867	1.141	0.877	0.926
636	256	190.844	105	245	29.948	10.884	50.95	0.607	2.752	0.363	0.842
637	225	169.164	45	236	17.813	16.082	45.819	0.871	1.108	0.903	0.9
638	4509	177.182	13	251	125.535	45.733	9.15	0.546	2.745	0.364	0.855
639	308	144.354	17	243	27.719	14.148	85.491	0.701	1.959	0.51	0.865
640	7317	172.306	25	255	123.996	75.134	151.618	0.701	1.65	0.606	0.859
641	360	189.528	42	254	27.311	16.783	3.265	0.868	1.627	0.615	0.947
642	502	139.46	16	246	30.347	21.062	114.407	0.836	1.441	0.694	0.9
643	1381	150.163	30	252	44.749	39.293	153.169	0.954	1.139	0.878	0.986
644	305	174.469	61	236	25.995	14.939	36.278	0.801	1.74	0.575	0.913
645	4204	149.162	31	207	95.294	56.17	176.537	0.741	1.697	0.589	0.939
646	17711	142.033	18	241	349.802	64.466	14.859	0.29	5.426	0.184	0.623
647	350	200.426	103	255	26.012	17.132	143.007	0.723	1.518	0.659	0.893
648	272	190.75	92	234	20.067	17.258	146.179	0.923	1.163	0.86	0.986
649	2198	165.399	20	251	100.51	27.844	174.166	0.4	3.61	0.277	0.741
650	65277	183.397	19	255	433.396	191.772	165.388	0.224	2.26	0.442	0.621
651	1602	146.753	27	251	56.906	35.844	21.8	0.829	1.588	0.63	0.916
652	556	170.75	59	235	31.982	22.135	73.122	0.884	1.445	0.692	0.939
653	303	207.003	61	247	23.218	16.616	169.811	0.903	1.397	0.716	0.947
654	597	153.392	40	253	39.958	19.023	91.075	0.655	2.101	0.476	0.863
655	33397	178.281	18	255	252.147	168.641	8.127	0.28	1.495	0.669	0.725
656	2812	190.847	43	255	68.69	52.124	35.518	0.839	1.318	0.759	0.919
657	492	176.711	57	252	32.845	19.072	29.774	0.764	1.722	0.581	0.904
658	275	159.982	49	237	19.055	18.375	51.232	0.99	1.037	0.964	0.975
659	732	145.016	37	207	38.285	24.344	171.216	0.825	1.573	0.636	0.961
660	243	183.387	43	253	21.405	14.455	40.065	0.753	1.481	0.675	0.9
661	530	120.889	24	235	32.76	20.599	74.326	0.688	1.59	0.629	0.847
662	469	136.955	40	222	31.741	18.813	61.145	0.85	1.687	0.593	0.916
663	859	172.437	35	230	36.518	29.95	81.657	0.871	1.219	0.82	0.94
664	1221	163.971	48	220	43.001	36.153	143.036	0.906	1.189	0.841	0.958
665	489	150.106	44	209	34.178	18.217	67.361	0.566	1.876	0.533	0.823
666	389	184.82	67	236	29.723	16.664	159.244	0.837	1.784	0.561	0.94
667	112	159.134	75	215	13.006	10.965	80	0.93	1.186	0.843	0.966
668	521	186.44	72	238	34.794	19.065	176.902	0.648	1.825	0.548	0.922
669	259	185.085	62	232	20.634	15.982	6.64	0.837	1.291	0.775	0.895
670	197	177.091	70	235	18.285	13.718	136.781	0.756	1.333	0.75	0.851
671	271	168.723	57	223	22.982	15.014	31.157	0.841	1.531	0.653	0.934
672	367	166.213	54	249	23.83	19.609	12.41	0.927	1.215	0.823	0.965
673	222	152.968	46	237	19.712	14.339	175.63	0.915	1.375	0.727	0.941
674	210	183.529	75	229	18.156	14.727	119.713	0.926	1.233	0.811	0.957
675	566	136.339	45	181	35.098	20.532	150.615	0.765	1.709	0.585	0.913
676	1291	102.415	9	217	68.457	24.011	158.708	0.519	2.851	0.351	0.821
677	236	162.513	45	225	20.175	14.894	19.516	0.83	1.355	0.738	0.901
678	1051	109.554	19	201	51.549	25.959	177.85	0.797	1.986	0.504	0.952
679	160	196.625	47	242	15.653	13.015	75.208	0.878	1.203	0.831	0.985
680	225	158.107	29	227	17.909	15.996	25.728	0.941	1.12	0.893	0.974
681	252	169.218	31	249	23.46	13.677	12.589	0.823	1.715	0.583	0.932

## Sheet: LC2008
	Area	Mean	Min	Max	Major	Minor	Angle	Circ.	AR	Round	Solidity
1	47903.6	185.652	48	255	304.867	200.063	0.635	0.775	1.524	0.656	0.961
2	133623	136.762	21	255	591.87	287.452	155.919	0.525	2.059	0.486	0.843
3	4404.68	135.433	23	191	90.956	61.658	16.063	0.701	1.475	0.678	0.876
4	2118.34	155.545	42	181	76.002	35.488	19.683	0.722	2.142	0.467	0.915
5	13725.3	86.99	1	250	249.088	70.159	148.63	0.541	3.55	0.282	0.924
6	1482.83	90.005	23	134	66.033	28.592	42.517	0.681	2.31	0.433	0.875
7	303696	144.169	7	205	850.188	454.815	177.95	0.261	1.869	0.535	0.71
8	2878.01	117.023	22	162	77.892	47.045	34.108	0.69	1.656	0.604	0.905
9	16084.7	110.25	5	167	210.301	97.383	4.08	0.52	2.16	0.463	0.817
10	9495.98	130.558	5	178	129.232	93.558	31.224	0.759	1.381	0.724	0.905
11	11840.8	93.606	10	164	135.686	111.111	90.954	0.778	1.221	0.819	0.929
12	13915.3	114.349	12	168	176.755	100.237	89.668	0.684	1.763	0.567	0.894
13	13608.5	124.06	23	175	218.477	79.307	132.635	0.585	2.755	0.363	0.885
14	12943.8	113.687	18	162	168.308	97.919	50.706	0.513	1.719	0.582	0.766
15	185902	119.711	1	217	717.557	329.867	24.408	0.331	2.175	0.46	0.729
16	1102.99	131.298	21	184	46.758	30.035	119.318	0.772	1.557	0.642	0.893
17	10321.4	142.159	5	222	155.749	84.377	37.173	0.46	1.846	0.542	0.755
18	4105.19	142.094	17	199	99.986	52.276	156.129	0.69	1.913	0.523	0.869
19	920.38	180.508	90	202	40.795	28.726	17.823	0.875	1.42	0.704	0.962
20	2892.62	101.712	8	193	91.905	40.074	0.436	0.632	2.293	0.436	0.907
21	12490.9	138.711	13	216	216.574	73.434	161.643	0.451	2.949	0.339	0.729
22	752.374	153.01	52	179	33.65	28.468	6.813	0.827	1.182	0.846	0.9
23	81592.4	144.017	8	223	545.509	190.44	169.179	0.257	2.864	0.349	0.577
24	4631.12	150.792	19	207	83.971	70.221	43.845	0.856	1.196	0.836	0.942
25	1935.72	186.925	37	215	55.149	44.691	85.877	0.817	1.234	0.81	0.911
26	997969	131.957	0	225	1332.46	953.616	140.784	0.151	1.397	0.716	0.673
27	3732.65	137.591	15	210	84.53	56.224	96.736	0.748	1.503	0.665	0.929
28	2819.58	130.316	31	202	68.832	52.156	0.122	0.836	1.32	0.758	0.93
29	60007.3	134.592	4	223	302.235	252.796	94.883	0.332	1.196	0.836	0.765
30	12549.3	112.964	13	189	180.732	88.409	179.056	0.445	2.044	0.489	0.714
31	3659.61	85.094	11	148	99.225	46.959	31.222	0.673	2.113	0.473	0.899
32	18729	161.367	12	215	171.956	138.678	4.483	0.788	1.24	0.806	0.927
33	13842.2	135.006	15	195	160.692	109.678	50.895	0.639	1.465	0.683	0.869
34	3170.2	136.037	13	204	63.885	63.183	113.625	0.874	1.011	0.989	0.966
35	2951.06	130.334	17	186	73.949	50.811	50.315	0.746	1.455	0.687	0.859
36	40095	141.591	11	215	316.658	161.216	11.769	0.245	1.964	0.509	0.507
37	3637.69	140.663	22	217	91.705	50.506	55.102	0.687	1.816	0.551	0.852
38	325902	73.127	0	212	1047.5	396.137	165.439	0.41	2.644	0.378	0.805
39	927.684	158.591	13	213	40.066	29.48	91.885	0.864	1.359	0.736	0.914
40	4309.72	168.069	16	218	85.586	64.115	159.07	0.815	1.335	0.749	0.937
41	4287.8	131.332	12	208	89.004	61.339	4.459	0.702	1.451	0.689	0.88
42	17231.6	132.193	13	205	167.684	130.841	28.772	0.7	1.282	0.78	0.883
43	11665.4	127.571	9	211	187.967	79.019	178.204	0.706	2.379	0.42	0.96
44	2191.38	162.843	38	209	66.025	42.259	119.784	0.857	1.562	0.64	0.94
45	6815.19	142.447	6	215	143.731	60.372	122.89	0.701	2.381	0.42	0.915
46	25493.1	113.531	3	211	249.226	130.238	127.174	0.547	1.914	0.523	0.806
47	49817.4	80.749	0	207	375.533	168.905	159.313	0.34	2.223	0.45	0.622
48	22125.6	131.276	10	209	284.513	99.016	147.61	0.507	2.873	0.348	0.789
49	8823.96	85.608	15	186	163.69	68.636	172.492	0.617	2.385	0.419	0.853
50	71921.1	157.269	7	196	428.305	213.803	160.179	0.255	2.003	0.499	0.668
51	27596.8	137.337	11	209	274.522	127.995	9.981	0.407	2.145	0.466	0.693
52	26508.4	128.793	13	175	244.513	138.036	171.088	0.492	1.771	0.565	0.804
53	35785.2	120.634	0	255	284.836	159.963	31.909	0.493	1.781	0.562	0.821
54	15558.8	77.707	11	171	280.521	70.619	55.521	0.286	3.972	0.252	0.533
55	5836.38	142.743	41	253	115.9	64.117	27.236	0.658	1.808	0.553	0.838
56	5339.66	142.222	13	191	95.42	71.25	85.667	0.726	1.339	0.747	0.883
57	5726.81	132.675	9	199	141.211	51.636	36.796	0.548	2.735	0.366	0.825
58	1906.5	149.437	25	202	54.34	44.671	16.266	0.889	1.216	0.822	0.941
59	211980	132.361	6	216	768.613	351.153	42.068	0.166	2.189	0.457	0.501
60	300248	114.799	2	216	1055.98	362.022	34.691	0.131	2.917	0.343	0.4
61	94872.2	137.952	15	208	476.796	253.347	40.58	0.198	1.882	0.531	0.546
62	9897.74	128.843	14	215	162.441	77.58	0.491	0.565	2.094	0.478	0.833
63	1826.15	163.904	58	206	77.615	29.957	142.081	0.652	2.591	0.386	0.87
64	5631.85	130.661	20	192	114.252	62.762	8.784	0.662	1.82	0.549	0.845
65	1796.93	134.394	48	185	52.2	43.83	127.951	0.385	1.191	0.84	0.706
66	2271.73	128.939	30	168	91.567	31.588	83.948	0.562	2.899	0.345	0.881
67	2498.17	139.161	12	214	86.136	36.927	2.726	0.674	2.333	0.429	0.891
68	2549.31	146.092	34	211	81.689	39.735	110.701	0.738	2.056	0.486	0.905
69	28130	127.176	5	219	246.301	145.417	48.409	0.465	1.694	0.59	0.773
70	51008	147.39	7	221	269.314	241.151	100.207	0.728	1.117	0.895	0.905
71	234814	128.287	0	218	607.057	492.498	153.502	0.41	1.233	0.811	0.737
72	4894.08	162.533	12	217	100.984	61.706	98.189	0.528	1.637	0.611	0.836
73	33674.2	116.019	1	219	289.558	148.072	16.818	0.276	1.956	0.511	0.499
74	21227.2	150.966	8	221	207.162	130.465	78.807	0.533	1.588	0.63	0.784
75	708.546	151.515	36	206	35.342	25.526	39.027	0.867	1.385	0.722	0.894
76	39517.9	138.607	4	214	294.047	171.114	18.486	0.185	1.718	0.582	0.434
77	7114.68	174.902	13	222	105.126	86.17	131.98	0.903	1.22	0.82	0.954
78	7180.42	140.299	10	221	106.404	85.922	122.59	0.826	1.238	0.808	0.944
79	4791.82	145.608	22	218	98.576	61.893	166.096	0.821	1.593	0.628	0.948
80	34879.5	136.809	10	211	296.667	149.696	75.91	0.406	1.982	0.505	0.742
81	41227.2	159.028	4	219	272.163	192.87	174.584	0.617	1.411	0.709	0.848
82	7567.57	158.747	13	207	106.034	90.87	140.045	0.887	1.167	0.857	0.954
83	10986.1	129.404	11	205	256.55	54.523	12.394	0.205	4.705	0.213	0.477
84	75471.1	114.576	15	196	581.183	165.34	114.511	0.214	3.515	0.284	0.597
85	246771	113.5	10	204	623.555	503.884	121.189	0.351	1.237	0.808	0.735
86	2549.31	130.232	29	191	100.527	32.289	130.118	0.404	3.113	0.321	0.691
87	9145.36	124.313	4	204	170.902	68.134	39.447	0.422	2.508	0.399	0.652
88	19780.9	156.167	8	215	212.281	118.644	61.303	0.754	1.789	0.559	0.95
89	44616.5	126.581	2	223	265.27	214.149	37.962	0.668	1.239	0.807	0.899
90	840.029	178.157	58	216	35.561	30.077	109.939	0.677	1.182	0.846	0.819
91	304617	104.155	0	225	890.263	435.658	131.701	0.204	2.043	0.489	0.588
92	20095	136.247	6	220	182.722	140.025	156.22	0.642	1.305	0.766	0.841
93	1899.2	140.235	11	199	55.384	43.661	172.154	0.787	1.269	0.788	0.901
94	53506.2	109.142	2	210	270.394	251.952	137.58	0.383	1.073	0.932	0.729
95	12176.8	138.155	1	212	155.213	99.888	149.984	0.649	1.554	0.644	0.846
96	13973.7	118.162	2	210	181.539	98.006	147.522	0.499	1.852	0.54	0.78
97	10357.9	160.16	4	207	159.053	82.917	125.619	0.778	1.918	0.521	0.938
98	58385.7	99.358	0	208	525.261	141.528	173.41	0.378	3.711	0.269	0.748
99	15434.6	106.981	2	216	177.287	110.849	58.011	0.843	1.599	0.625	0.961
100	1241.78	134.912	8	186	47.197	33.5	171.765	0.88	1.409	0.71	0.955
101	1212.56	171.91	61	202	44.133	34.983	156.417	0.826	1.262	0.793	0.946
102	41884.6	92.453	0	213	402.858	132.377	164.808	0.31	3.043	0.329	0.656
103	116545	147.037	0	255	411.732	360.403	14.246	0.58	1.142	0.875	0.844
104	13133.7	131.429	4	190	150.714	110.954	127.773	0.737	1.358	0.736	0.889
105	4236.67	160.757	20	212	106.637	50.585	14.151	0.752	2.108	0.474	0.93
106	11344	147.99	4	216	154.187	93.677	93.628	0.817	1.646	0.608	0.954
107	3696.13	128.478	18	192	78.384	60.038	129.837	0.883	1.306	0.766	0.944
108	1731.19	78.772	18	167	71.958	30.632	112.147	0.65	2.349	0.426	0.859
109	8714.39	78.179	10	185	114.011	97.319	97.562	0.782	1.172	0.854	0.935
110	1351.35	138.859	22	182	47.112	36.521	141.21	0.898	1.29	0.775	0.969
111	290394	90.903	0	217	1000.23	369.657	15.143	0.351	2.706	0.37	0.682
112	247348	103.142	0	222	689.203	456.953	167.552	0.513	1.508	0.663	0.848
113	20394.4	121.81	2	218	169.52	153.18	176.29	0.84	1.107	0.904	0.944
114	24265.9	92.203	1	216	248.629	124.267	123.459	0.645	2.001	0.5	0.859
115	9320.67	113.731	11	207	151.199	78.489	5.366	0.479	1.926	0.519	0.785
116	78933.5	157.266	19	252	437.6	229.665	49.175	0.481	1.905	0.525	0.832
117	21782.3	133.363	9	180	230.207	120.475	28.317	0.735	1.911	0.523	0.929
118	4579.98	149.86	34	191	95.58	61.011	145.263	0.709	1.567	0.638	0.867
119	27355.7	117.019	18	206	313.527	111.092	169.588	0.508	2.822	0.354	0.796
120	10920.4	123.77	21	174	146.361	95	67.579	0.839	1.541	0.649	0.961
121	216348	131.897	9	200	963.737	285.827	3.162	0.159	3.372	0.297	0.584
122	11344	149.784	18	183	141.366	102.173	50.405	0.792	1.384	0.723	0.915
123	1899.2	125.712	17	174	77.457	31.219	89.539	0.562	2.481	0.403	0.836
124	4704.16	111.974	5	181	90.343	66.298	52.295	0.588	1.363	0.734	0.832
125	59846.6	148.197	12	211	313.916	242.737	100.394	0.775	1.293	0.773	0.917
126	15741.4	141.818	15	201	178.616	112.211	143.511	0.701	1.592	0.628	0.895
127	317356	58.758	0	220	1261.87	320.215	159.276	0.236	3.941	0.254	0.655
128	9934.26	86.878	3	206	220.055	57.48	154.161	0.436	3.828	0.261	0.828
129	5763.33	101.918	9	209	111.685	65.704	0.391	0.578	1.7	0.588	0.781
130	3126.37	161.343	30	198	73.509	54.152	90.014	0.819	1.357	0.737	0.941
131	90189.9	130.693	11	218	603.102	190.405	14.409	0.312	3.167	0.316	0.632
132	11110.3	107.187	20	215	185.889	76.1	42.41	0.47	2.443	0.409	0.746
133	25719.5	144.245	13	224	203.133	161.21	138.429	0.533	1.26	0.794	0.763
134	3813	100.845	5	198	109.667	44.269	33.466	0.557	2.477	0.404	0.794
135	6705.62	137.09	11	209	141.829	60.198	23.247	0.692	2.356	0.424	0.893
136	10978.8	132.168	5	211	257.195	54.351	154.92	0.296	4.732	0.211	0.655
137	46895.5	121.25	0	215	347.399	171.875	8.191	0.637	2.021	0.495	0.897
138	5244.7	146.572	18	203	124.614	53.587	172.888	0.718	2.325	0.43	0.941
139	20175.3	120.702	1	215	187.403	137.073	177.22	0.519	1.367	0.731	0.763
140	13462.4	144.581	13	204	150.846	113.631	151.714	0.841	1.328	0.753	0.943
141	12520.1	123.396	16	205	172.639	92.337	54.974	0.432	1.87	0.535	0.708
142	9174.58	95.488	16	188	135.647	86.117	156.162	0.668	1.575	0.635	0.889
143	4317.02	173.313	32	218	90.174	60.955	98.508	0.867	1.479	0.676	0.939
144	176706	98.606	8	200	683.295	329.27	171.377	0.294	2.075	0.482	0.681
145	6625.27	118.018	16	192	117.639	71.707	78.285	0.821	1.641	0.61	0.975
146	4572.68	136.088	30	193	107.246	54.288	133.13	0.809	1.976	0.506	0.951
147	205581	113.454	11	203	649.317	403.121	11.243	0.442	1.611	0.621	0.79
148	3907.96	158.716	31	205	120.432	41.316	2.9	0.474	2.915	0.343	0.747
149	19422.9	126.309	16	216	317.033	78.005	142.548	0.424	4.064	0.246	0.841
150	7691.75	154.841	18	217	136	72.011	172.313	0.746	1.889	0.529	0.918
151	1387.87	161.284	24	214	51.505	34.309	32.669	0.652	1.501	0.666	0.815
152	12089.1	128.598	3	213	210.559	73.102	23.567	0.423	2.88	0.347	0.724
153	1219.87	158.341	19	207	48.424	32.074	116.095	0.814	1.51	0.662	0.923
154	7012.42	145.827	7	217	137.423	64.971	17.314	0.564	2.115	0.473	0.805
155	8977.36	102.591	3	208	128.957	88.637	70.083	0.476	1.455	0.687	0.718
156	34134.4	150.707	11	223	216.266	200.962	60.178	0.606	1.076	0.929	0.797
157	57246.2	139.98	9	221	307.801	236.803	141.947	0.302	1.3	0.769	0.68
158	22892.6	155.326	26	220	237.709	122.619	7.397	0.23	1.939	0.516	0.612
159	1475.53	169.51	50	204	47.85	39.262	64.213	0.905	1.219	0.821	0.957
160	1095.69	164.653	60	193	55.129	25.306	136.196	0.708	2.179	0.459	0.872
161	1482.83	162.946	31	206	53.298	35.424	140.117	0.774	1.505	0.665	0.919
162	12103.7	141.582	6	214	134.981	114.171	57.405	0.862	1.182	0.846	0.936
163	4149.01	137.736	26	209	80.334	65.759	127.594	0.844	1.222	0.819	0.916
164	21986.9	152.022	1	218	231.406	120.976	146.656	0.545	1.913	0.523	0.828
165	5325.06	160.285	8	210	95.153	71.255	40.773	0.775	1.335	0.749	0.876
166	5975.16	162.489	12	207	89.414	85.086	152.668	0.875	1.051	0.952	0.943
167	11249.1	132.861	7	213	232.756	61.535	171.825	0.422	3.782	0.264	0.8
168	5829.07	106.214	2	206	161.513	45.952	177.94	0.538	3.515	0.285	0.909
169	5003.65	101.055	1	207	91.572	69.572	160.428	0.643	1.316	0.76	0.817
170	4623.81	153.362	20	208	96.238	61.174	79.105	0.851	1.573	0.636	0.953
171	1271	136.247	44	179	44.28	36.546	158.86	0.851	1.212	0.825	0.933
172	5500.36	114.478	9	206	103.362	67.755	73.821	0.774	1.526	0.656	0.953
173	11643.5	128.063	11	215	180.153	82.291	2.897	0.656	2.189	0.457	0.936
174	1555.88	135.869	16	201	57.878	34.227	173.46	0.699	1.691	0.591	0.884
175	11022.6	120.974	10	198	140.188	100.112	176.702	0.897	1.4	0.714	0.976
176	5872.9	114.357	14	197	89.646	83.412	173.632	0.875	1.075	0.93	0.952
177	4324.32	144.549	28	211	107.876	51.039	174.707	0.558	2.114	0.473	0.791
178	1490.14	171.142	61	213	50.584	37.508	61.181	0.853	1.349	0.742	0.911
179	52505.5	151.561	6	218	355.784	187.901	149.173	0.46	1.893	0.528	0.776
180	37881.7	87.203	0	213	263.611	182.968	159.792	0.255	1.441	0.694	0.511
181	27100.1	145.645	7	223	238.229	144.839	169.397	0.803	1.645	0.608	0.964
182	19861.2	147.933	5	223	187.478	134.885	77.281	0.698	1.39	0.719	0.888
183	8254.2	160.416	17	218	109.532	95.95	174.432	0.722	1.142	0.876	0.882
184	4024.84	170.243	22	219	91.503	56.005	115.754	0.799	1.634	0.612	0.925
185	4755.3	142	12	214	113.995	53.113	100.91	0.432	2.146	0.466	0.736
186	2790.36	144.717	21	204	69.196	51.344	160.721	0.698	1.348	0.742	0.878
187	7092.77	98.23	10	200	168.589	53.567	32.931	0.501	3.147	0.318	0.82
188	11139.5	113.081	16	206	146.334	96.924	63.674	0.508	1.51	0.662	0.718
189	2417.82	171.955	47	217	65.233	47.192	115.152	0.71	1.382	0.723	0.934
190	3469.69	145.402	12	211	77.595	56.934	134.906	0.813	1.363	0.734	0.918
191	31716.6	135.984	9	222	306.704	131.667	43.76	0.452	2.329	0.429	0.772
192	75179	108.876	3	219	480.554	199.188	11.753	0.326	2.413	0.414	0.707
193	759.679	116.163	22	198	39.905	24.239	72.694	0.869	1.646	0.607	0.937
194	1073.78	154.803	61	203	41.333	33.077	121.288	0.919	1.25	0.8	0.967
195	27910.9	151.406	11	224	193.941	183.237	37.081	0.705	1.058	0.945	0.874
196	3389.34	87.573	7	197	94.894	45.476	16.082	0.73	2.087	0.479	0.92
197	7969.32	135.355	6	214	127.658	79.485	55.759	0.786	1.606	0.623	0.923
198	3060.63	156.146	43	200	90.521	43.05	23.394	0.712	2.103	0.476	0.878
199	13520.8	136.19	8	211	156.118	110.27	104.389	0.85	1.416	0.706	0.959
200	1964.94	138.695	40	191	68.584	36.479	166.903	0.718	1.88	0.532	0.915
201	1943.02	115.65	8	206	79.238	31.222	152.813	0.636	2.538	0.394	0.906
202	3148.28	144.968	29	199	68.661	58.382	34.357	0.798	1.176	0.85	0.896
203	58911.6	124.873	0	218	405.709	184.883	63.653	0.627	2.194	0.456	0.873
204	6274.65	140.962	13	214	144.312	55.36	2.805	0.662	2.607	0.384	0.952
205	2191.38	167.6	30	215	65.776	42.419	32.844	0.686	1.551	0.645	0.877
206	16282	138.589	3	218	154.351	134.31	32.015	0.847	1.149	0.87	0.948
207	4521.55	147.562	25	206	126.627	45.464	2.292	0.669	2.785	0.359	0.962
208	2454.35	172.839	28	211	73.47	42.534	51.776	0.813	1.727	0.579	0.932
209	15945.9	125.918	8	215	169.505	119.778	66.947	0.62	1.415	0.707	0.868
210	46946.7	118.035	3	217	335.974	177.914	20.143	0.237	1.888	0.53	0.588
211	1234.48	106.994	5	201	44.43	35.376	14.969	0.783	1.256	0.796	0.892
212	2045.29	149.043	34	203	66.558	39.126	175.159	0.773	1.701	0.588	0.981
213	5398.1	99.409	9	195	120.552	57.013	16.342	0.712	2.114	0.473	0.895
214	1950.33	177.704	33	210	54.866	45.26	15.718	0.931	1.212	0.825	0.96
215	3484.3	152.564	8	209	77.501	57.242	18.939	0.86	1.354	0.739	0.933
216	2454.35	178.768	45	218	66.832	46.758	22.651	0.864	1.429	0.7	0.945
217	3228.63	135.959	14	201	74.829	54.936	57.878	0.701	1.362	0.734	0.855
218	4543.46	136.621	10	214	89.225	64.835	50.102	0.724	1.376	0.727	0.884
219	3637.69	151.102	23	205	88.435	52.374	15.456	0.824	1.689	0.592	0.939
220	26530.3	129.924	7	220	241.892	139.647	168.496	0.513	1.732	0.577	0.773
221	2987.58	148.083	17	207	97.119	39.167	23.028	0.674	2.48	0.403	0.895
222	42731.9	145.529	16	225	348.362	156.182	9.935	0.531	2.23	0.448	0.794
223	35704.9	130.267	4	219	287.628	158.054	38.902	0.672	1.82	0.55	0.907
224	5690.28	143.741	22	218	109.012	66.461	16.069	0.81	1.64	0.61	0.942
225	39758.9	130.937	5	219	280.67	180.364	165.061	0.549	1.556	0.643	0.788
226	21190.7	137.424	9	217	273.936	98.493	49.465	0.429	2.781	0.36	0.682
227	710942	131.583	2	220	1706.36	530.486	157.21	0.349	3.217	0.311	0.768
228	2600.44	149.966	42	210	94.209	35.145	4.794	0.564	2.681	0.373	0.836
229	920.38	163.119	89	181	36.836	31.813	123.435	0.894	1.158	0.864	0.94
230	336.012	134.261	53	183	24.512	17.453	29.516	0.941	1.404	0.712	0.968
231	1921.11	161.015	46	211	57.1	42.838	5.492	0.88	1.333	0.75	0.976
232	1628.93	184.794	64	218	52.236	39.705	22.298	0.842	1.316	0.76	0.949
233	3038.71	161.067	31	214	88.531	43.702	125.955	0.712	2.026	0.494	0.884
234	1716.58	125.783	24	205	56.379	38.767	173.293	0.78	1.454	0.688	0.888
235	810.811	92.36	16	198	47.631	21.674	37.938	0.692	2.198	0.455	0.906
236	3301.68	152.555	17	217	72.165	58.253	54.224	0.852	1.239	0.807	0.938
237	47589.5	137.342	6	219	266.614	227.268	119.063	0.828	1.173	0.852	0.923
238	3396.64	131.417	15	202	111.961	38.627	158.501	0.542	2.899	0.345	0.796
239	14726.1	57.305	5	189	191.285	98.021	149.431	0.833	1.951	0.512	0.978
240	8955.44	145.777	17	218	170.985	66.687	2.843	0.597	2.564	0.39	0.868
241	44375.5	141.159	9	223	271.016	208.477	14.554	0.661	1.3	0.769	0.853
242	5412.71	150.182	30	220	113.184	60.889	7.281	0.726	1.859	0.538	0.906
243	4806.43	165.258	41	223	84.291	72.602	173.046	0.846	1.161	0.861	0.929
244	1446.31	137.515	26	207	45.688	40.306	39.398	0.841	1.134	0.882	0.921
245	4010.23	157.069	31	218	74.702	68.351	15.555	0.836	1.093	0.915	0.934
246	9291.45	119.791	21	200	158.896	74.453	179.434	0.587	2.134	0.469	0.776
247	7552.96	134.431	6	212	137.611	69.884	179.802	0.722	1.969	0.508	0.943
248	4229.36	149.758	10	219	115.897	46.463	42.518	0.504	2.494	0.401	0.731
249	4485.03	166.344	21	223	92.733	61.58	149.467	0.848	1.506	0.664	0.945
250	2498.17	169.304	44	219	79.03	40.248	170.85	0.632	1.964	0.509	0.889
251	45485.8	124.114	6	222	271.926	212.978	135.868	0.328	1.277	0.783	0.662
252	3323.59	158.123	32	216	73.558	57.529	161.098	0.924	1.279	0.782	0.961
253	31219.9	135.548	4	221	280.935	141.493	38.26	0.484	1.985	0.504	0.771
254	5281.23	131.155	23	194	100.803	66.707	57.941	0.865	1.511	0.662	0.951
255	11103	125.295	24	198	137.454	102.847	51.266	0.787	1.336	0.748	0.911
256	10562.5	119.652	19	193	158.568	84.812	10.504	0.751	1.87	0.535	0.94
257	59693.2	123.994	8	209	325.943	233.181	41.57	0.503	1.398	0.715	0.791
258	28750.9	173.614	8	222	228.316	160.334	173.203	0.81	1.424	0.702	0.931
259	7041.64	164.555	21	216	124.37	72.089	6.602	0.797	1.725	0.58	0.931
260	1439.01	188.371	38	217	51.123	35.839	98.3	0.852	1.426	0.701	0.929
261	1161.43	198.421	78	215	41.731	35.436	14.627	0.851	1.178	0.849	0.898
262	2388.61	172.664	56	208	63.851	47.631	102.231	0.862	1.341	0.746	0.941
263	6413.44	182.228	43	224	105.376	77.492	78.51	0.915	1.36	0.735	0.966
264	2658.88	178.42	33	221	62.584	54.093	26.431	0.933	1.157	0.864	0.954
265	2600.44	137.149	16	220	62.149	53.275	105.266	0.886	1.167	0.857	0.925
266	1446.31	169.722	75	211	48.603	37.888	119.227	0.865	1.283	0.78	0.936
267	2951.06	188.75	39	222	72.931	51.52	156.225	0.86	1.416	0.706	0.93
268	1891.89	149.17	25	200	59.147	40.726	158.539	0.851	1.452	0.689	0.949
269	5003.65	136.72	21	199	108.159	58.903	165.474	0.693	1.836	0.545	0.873
270	818.115	118.089	16	194	45.906	22.691	178.385	0.766	2.023	0.494	0.974
271	1285.61	160.074	28	198	72.591	22.549	151.386	0.498	3.219	0.311	0.793
272	46260	115.65	4	186	363.663	161.964	105.584	0.268	2.245	0.445	0.612
273	34258.6	157.008	20	251	259.505	168.087	84.771	0.708	1.544	0.648	0.918
274	5668.37	155.707	31	192	98.167	73.52	93.923	0.831	1.335	0.749	0.941
275	547.845	143.4	89	177	32.475	21.479	41.992	0.733	1.512	0.661	0.824
276	1804.24	148.279	18	194	77.747	29.547	112.422	0.548	2.631	0.38	0.793
277	3783.78	145.506	11	204	103.121	46.719	24.144	0.632	2.207	0.453	0.885
278	4170.93	126.368	28	204	83.366	63.702	160.307	0.819	1.309	0.764	0.912
279	949.598	183.723	81	215	36.322	33.287	177.213	0.853	1.091	0.916	0.935
280	1015.34	150.532	52	212	49.449	26.143	94.129	0.744	1.891	0.529	0.894
281	445.581	167.902	111	193	33.391	16.99	143.759	0.602	1.965	0.509	0.787
282	2994.89	106.027	11	208	99.117	38.472	171.228	0.329	2.576	0.388	0.574
283	1271	168.552	57	208	58.46	27.682	107.87	0.637	2.112	0.474	0.815
284	6764.06	153.721	19	216	129.009	66.757	160.369	0.719	1.933	0.517	0.925
285	847.334	187.405	98	218	41.076	26.265	52.851	0.706	1.564	0.639	0.803
286	679.328	191.054	91	217	31.189	27.733	35.434	0.824	1.125	0.889	0.89
287	1891.89	167.903	29	222	59.403	40.551	35.097	0.884	1.465	0.683	0.938
288	1176.04	142.634	26	201	52.011	28.79	174.737	0.784	1.807	0.554	0.92
289	323901	120.577	12	197	1069.91	385.457	17.583	0.299	2.776	0.36	0.653
290	4119.8	122.881	19	200	90.235	58.131	82.159	0.818	1.552	0.644	0.932
291	3593.86	142.62	65	179	88.083	51.949	39.221	0.804	1.696	0.59	0.931
292	7465.3	110.901	17	198	107.736	88.226	16.502	0.851	1.221	0.819	0.944
293	9466.76	115.867	14	187	172.709	69.791	60.113	0.675	2.475	0.404	0.918
294	63433.2	123.884	8	202	545.16	148.15	153.441	0.178	3.68	0.272	0.61
295	23842.2	126.911	9	201	220.646	137.582	159.679	0.581	1.604	0.624	0.824
296	26851.7	118.123	5	196	229.871	148.73	88.729	0.687	1.546	0.647	0.91
297	10306.8	147.556	21	211	192.079	68.321	8.611	0.453	2.811	0.356	0.712
298	110343	152.901	19	217	456.025	308.083	172.725	0.759	1.48	0.676	0.936
299	47209.6	140.631	18	229	259.395	231.728	122.831	0.779	1.119	0.893	0.915
300	30029.2	136.838	10	216	305.432	125.181	153.654	0.473	2.44	0.41	0.738
301	5748.72	160.484	28	206	115.475	63.386	7.336	0.742	1.822	0.549	0.892
302	11555.9	148.88	32	208	148.668	98.968	0.637	0.762	1.502	0.666	0.902
303	25157	149.875	18	222	225.414	142.098	179.64	0.824	1.586	0.63	0.938
304	13294.4	141.86	12	223	144.959	116.771	15.235	0.818	1.241	0.806	0.938
305	17852.4	169.22	10	219	165.269	137.536	59.282	0.79	1.202	0.832	0.919
306	354449	135.834	8	228	902.738	499.921	174.585	0.404	1.806	0.554	0.729
307	10569.8	173.207	20	217	142.825	94.226	64.177	0.816	1.516	0.66	0.929
308	8765.52	157.768	19	221	116.699	95.636	133.581	0.816	1.22	0.82	0.921
309	60854.6	165.577	14	224	356.727	217.204	143.472	0.696	1.642	0.609	0.902
310	9320.67	128.491	6	218	149.574	79.341	164.15	0.759	1.885	0.53	0.932
311	179701	167.4	19	230	631.726	362.185	140.847	0.375	1.744	0.573	0.727
312	49569	147.993	20	220	320.529	196.903	149.942	0.321	1.628	0.614	0.676
313	34119.8	168.2	11	225	217.604	199.641	174.616	0.933	1.09	0.917	0.972
314	6187	172.113	59	209	121.699	64.73	38.392	0.687	1.88	0.532	0.882
315	78451.4	145.511	10	220	541.361	184.512	3.644	0.349	2.934	0.341	0.708
316	21227.2	146.079	10	215	278.267	97.127	20.037	0.531	2.865	0.349	0.843
317	6910.15	142.748	33	183	102.355	85.959	165.706	0.886	1.191	0.84	0.956
318	19072.3	140.756	39	197	206.246	117.741	29.95	0.682	1.752	0.571	0.893
319	31570.5	159.358	18	224	207.929	193.32	118.135	0.91	1.076	0.93	0.962
320	5222.79	173.424	30	225	118.49	56.122	136.445	0.569	2.111	0.474	0.806
321	22315.6	190.552	30	223	231.815	122.568	24.403	0.69	1.891	0.529	0.86
322	35157	179.962	24	233	271.887	164.64	47.055	0.726	1.651	0.606	0.878
323	30241.1	173.41	22	227	276.06	139.477	105.138	0.343	1.979	0.505	0.659
324	10292.2	139.616	16	204	183.621	71.367	56.111	0.632	2.573	0.389	0.894
325	19620.2	136.372	27	210	170.508	146.511	45.188	0.748	1.164	0.859	0.894
326	3031.41	170.651	52	200	79.866	48.327	159.474	0.772	1.653	0.605	0.924
327	15069.4	119.552	16	212	161.447	118.843	25.915	0.233	1.358	0.736	0.575
328	8962.75	147.604	25	206	163.524	69.786	44.166	0.601	2.343	0.427	0.814
329	269364	172.303	7	226	796.281	430.709	25.6	0.589	1.849	0.541	0.889
330	81351.4	133.191	15	225	336.344	307.957	157.2	0.411	1.092	0.916	0.796
331	92308.3	141.294	10	227	435.861	269.651	91.188	0.476	1.616	0.619	0.758
332	2921.84	174.565	68	219	76.413	48.685	118	0.768	1.57	0.637	0.867
333	3469.69	182.048	49	221	72.212	61.177	59.884	0.886	1.18	0.847	0.927
334	4433.89	185.667	69	227	80.298	70.305	52.953	0.771	1.142	0.876	0.934
335	8597.52	174.909	31	228	128.384	85.266	174.503	0.69	1.506	0.664	0.869
336	1234.48	176.101	50	209	41.99	37.432	63.032	0.78	1.122	0.891	0.885
337	2622.35	174.348	25	220	70.734	47.203	167.754	0.636	1.499	0.667	0.823
338	526450	163.472	20	234	1154.54	580.577	1.906	0.427	1.989	0.503	0.802
339	10971.5	121.567	29	166	155.525	89.821	7.056	0.509	1.731	0.578	0.805
340	34981.7	138.514	24	198	391.225	113.848	14.064	0.286	3.436	0.291	0.718
341	15712.2	156.561	35	202	383.437	52.174	1.175	0.224	7.349	0.136	0.682
342	3221.33	131.63	26	205	110.237	37.206	142.193	0.513	2.963	0.338	0.833
343	4185.54	147.712	34	200	143.403	37.162	8.78	0.478	3.859	0.259	0.832
344	905.771	150.403	83	179	51.292	22.484	176.476	0.632	2.281	0.438	0.889
345	12184.1	85.29	15	171	139.049	111.567	25.799	0.463	1.246	0.802	0.772
346	9846.6	122.25	30	200	207.164	60.518	168.692	0.322	3.423	0.292	0.618
347	9320.67	113.137	25	232	153.416	77.355	100.743	0.436	1.983	0.504	0.709
348	33031.4	168.909	35	223	288.434	145.811	132.332	0.487	1.978	0.506	0.811
349	1351.35	178.886	74	214	50.178	34.29	168.058	0.83	1.463	0.683	0.925
350	19678.6	158.987	24	216	210.615	118.964	109.98	0.4	1.77	0.565	0.725
351	4433.89	171.511	33	221	106.54	52.989	37.761	0.683	2.011	0.497	0.877
352	438.276	194.417	145	208	35.016	15.936	68.397	0.759	2.197	0.455	0.896
353	51636.2	176.904	12	230	276.116	238.108	31.427	0.641	1.16	0.862	0.846
354	4295.11	172.621	72	220	92.298	59.25	145.264	0.801	1.558	0.642	0.937
355	865289	154.193	14	232	2077.62	530.279	7.368	0.154	3.918	0.255	0.578
356	141841	142.701	11	223	855.711	211.049	33.211	0.178	4.055	0.247	0.435
357	4558.07	118.785	20	192	127.044	45.681	9.901	0.567	2.781	0.36	0.831
358	5588.02	159.899	36	222	109.94	64.716	32.611	0.671	1.699	0.589	0.828
359	14748	155.283	24	228	227.824	82.422	170.837	0.456	2.764	0.362	0.756
360	156560	151.789	18	238	661.503	301.341	140.392	0.28	2.195	0.456	0.686
361	3564.65	161.623	52	221	78.05	58.151	178.253	0.558	1.342	0.745	0.75
362	8473.34	73.45	8	199	206.253	52.308	46.882	0.504	3.943	0.254	0.772
363	2103.72	191.781	37	220	58.371	45.888	54.257	0.83	1.272	0.786	0.903
364	4119.8	164.998	39	220	89.093	58.876	31.622	0.883	1.513	0.661	0.975
365	4207.45	157.16	23	225	89.772	59.675	21.456	0.644	1.504	0.665	0.809
366	8721.69	147.435	12	227	139.035	79.871	82.763	0.802	1.741	0.574	0.941
367	2016.07	183.533	69	223	62.143	41.307	110.99	0.873	1.504	0.665	0.98
368	2863.4	174.61	43	207	62.341	58.482	13.618	0.91	1.066	0.938	0.99
369	379.839	179.231	65	209	27.887	17.343	71.422	0.809	1.608	0.622	0.86
370	13864.1	169.779	22	221	137.363	128.509	149.683	0.584	1.069	0.936	0.817
371	29028.5	175.918	33	231	257.536	143.515	4.386	0.348	1.794	0.557	0.642
372	2527.39	148.379	72	193	80.923	39.766	70.526	0.788	2.035	0.491	0.949
373	745.069	153.873	41	210	33.647	28.194	9.031	0.928	1.193	0.838	0.981
374	25040.2	156.494	17	227	274.358	116.206	156.461	0.561	2.361	0.424	0.841
375	3199.42	170.317	64	211	93.537	43.551	141.792	0.722	2.148	0.466	0.906
376	7173.12	150.841	29	221	107.992	84.572	4.061	0.871	1.277	0.783	0.969
377	10555.1	136.69	26	217	167.083	80.434	98.892	0.499	2.077	0.481	0.768
378	11687.4	134.299	28	209	247.542	60.114	77.088	0.291	4.118	0.243	0.576
379	3075.24	183.071	70	220	66.377	58.989	19.51	0.847	1.125	0.889	0.971
380	13988.3	164.582	28	221	222.337	80.106	58.37	0.517	2.776	0.36	0.849
381	423.667	163.931	95	205	25.374	21.259	11.761	0.851	1.194	0.838	0.859
382	7392.26	176.452	24	213	107.488	87.564	120.487	0.841	1.228	0.815	0.948
383	1475.53	177.218	83	208	51.166	36.718	13.871	0.852	1.394	0.718	0.978
384	343.316	166.915	95	189	24.464	17.868	98.658	0.748	1.369	0.73	0.931
385	8794.74	124.758	12	209	116.363	96.232	135.395	0.856	1.209	0.827	0.95
386	6837.11	118.517	21	212	105.051	82.867	162.065	0.895	1.268	0.789	0.976
387	7618.7	147.542	24	212	152.295	63.695	74.799	0.617	2.391	0.418	0.855
388	19715.1	118.512	6	218	305.184	82.252	154.294	0.365	3.71	0.27	0.718
389	664.719	127.956	61	176	35.545	23.811	125.547	0.687	1.493	0.67	0.897
390	1081.08	154.851	49	193	40.057	34.363	14.466	0.937	1.166	0.858	0.977
391	3455.08	169.148	28	219	102.396	42.962	175.593	0.614	2.383	0.42	0.855
392	1344.05	127.679	20	172	54.442	31.433	156.965	0.803	1.732	0.577	0.934
393	47385	161.553	18	231	261.837	230.42	39.541	0.354	1.136	0.88	0.73
394	2257.12	184.686	76	222	60.163	47.768	112.086	0.78	1.259	0.794	0.89
395	1409.79	180.337	77	215	49.35	36.373	4.615	0.87	1.357	0.737	0.953
396	3900.66	158.777	23	215	94.361	52.633	10.716	0.539	1.793	0.558	0.785
397	3484.3	166.803	32	214	94.061	47.165	160.48	0.667	1.994	0.501	0.91
399	5916.73	128.983	13	216	128.602	58.579	35.18	0.512	2.195	0.456	0.78
400	1979.55	170.638	23	216	56.392	44.695	176.997	0.841	1.262	0.793	0.971
401	1000.73	129.161	38	195	56.737	22.458	1.547	0.68	2.526	0.396	0.945
402	1059.17	162.269	32	209	45.513	29.631	119.357	0.838	1.536	0.651	0.932
403	1227.17	124.571	41	187	63.178	24.732	21.976	0.496	2.555	0.391	0.723
404	1000.73	157.73	43	210	47.76	26.679	100.915	0.75	1.79	0.559	0.875
405	13871.4	144.356	14	216	254.048	69.521	27.624	0.341	3.654	0.274	0.674
406	3564.65	173.559	54	220	113.227	40.084	16.85	0.591	2.825	0.354	0.926
407	964.207	171.985	79	212	39.725	30.904	124.659	0.843	1.285	0.778	0.953
408	920.38	171.659	84	212	40.172	29.171	108.645	0.822	1.377	0.726	0.937
409	3184.81	143.257	23	198	106.754	37.985	101.39	0.546	2.81	0.356	0.822
410	6033.6	136.597	19	219	127.728	60.145	111.552	0.45	2.124	0.471	0.744
411	3593.86	134.236	24	197	83.896	54.542	135.42	0.397	1.538	0.65	0.676
412	3214.03	180.991	36	220	71.717	57.06	122.267	0.823	1.257	0.796	0.91
413	2249.82	173.458	37	216	68.267	41.961	170.781	0.811	1.627	0.615	0.929
414	12242.5	121.028	7	189	150.045	103.886	156.559	0.589	1.444	0.692	0.8
415	1760.41	106.983	3	180	73.184	30.627	71.121	0.661	2.39	0.418	0.909
416	7647.92	112.96	5	186	154.496	63.028	45.233	0.672	2.451	0.408	0.91
417	1650.84	144.642	68	182	54.573	38.516	30.04	0.893	1.417	0.706	0.944
418	1417.09	109.175	18	170	74.648	24.171	147.456	0.517	3.088	0.324	0.765
419	715.851	122.582	35	174	41.24	22.101	23.342	0.779	1.866	0.536	0.899
420	1716.58	131.447	31	188	65.4	33.419	172.892	0.738	1.957	0.511	0.925
421	34755.3	117.342	11	209	316.175	139.96	155.739	0.285	2.259	0.443	0.696
422	15997.1	126.695	16	188	177.449	114.783	149.01	0.737	1.546	0.647	0.908
423	21307.5	114.912	13	183	191.22	141.876	34.045	0.635	1.348	0.742	0.887

## Sheet: LC2026
	Area	Mean	Min	Max	Major	Minor	Angle	Circ.	AR	Round	Solidity
1	1268	97.458	26	126	45.089	35.807	80.621	0.784	1.259	0.794	0.931
2	1905	85.609	8	117	56.473	42.95	74.311	0.624	1.315	0.761	0.843
3	5020	83.252	4	128	129.949	49.186	175.47	0.577	2.642	0.379	0.874
4	21006	76.514	1	125	227.019	117.812	19.134	0.381	1.927	0.519	0.764
5	228	76.539	13	114	24.142	12.025	119.562	0.748	2.008	0.498	0.88
6	159	94.673	29	125	17.284	11.713	170.657	0.825	1.476	0.678	0.958
7	466	97.433	30	125	27.679	21.436	37.49	0.854	1.291	0.774	0.912
8	495	82.313	10	126	35.241	17.884	127.703	0.525	1.971	0.507	0.807
9	415	100.173	25	131	28.009	18.865	122.614	0.829	1.485	0.674	0.922
10	1298	87.746	5	132	46.674	35.409	26.232	0.862	1.318	0.759	0.943
11	174	84.776	26	112	20.37	10.876	133.899	0.749	1.873	0.534	0.874
12	260	83.131	26	128	23.642	14.002	114.28	0.846	1.688	0.592	0.963
13	366	68.877	7	120	23.213	20.075	148.707	0.894	1.156	0.865	0.957
14	129	103.209	45	119	19.927	8.243	94.759	0.618	2.417	0.414	0.809
15	4435	84.336	10	136	123.146	45.854	177.829	0.546	2.686	0.372	0.886
16	21679	82.478	16	145	194.901	141.624	116.331	0.368	1.376	0.727	0.675
17	902	98.31	18	139	48.935	23.469	178.83	0.688	2.085	0.48	0.869
18	987	69.548	8	135	48.45	25.938	0.32	0.648	1.868	0.535	0.89
19	1836	103.151	12	137	56.203	41.593	68.246	0.642	1.351	0.74	0.845
20	4735	88.855	8	136	99.919	60.337	49.511	0.407	1.656	0.604	0.682
21	4501	77.096	7	135	100.597	56.968	179.48	0.468	1.766	0.566	0.782
22	3993	66.909	5	138	116.116	43.784	66.867	0.54	2.652	0.377	0.833
23	1122	95.988	9	124	50.559	28.256	60.156	0.726	1.789	0.559	0.909
24	2258	69.208	4	114	59.16	48.596	83.436	0.7	1.217	0.821	0.862
25	990	61.06	7	104	54.225	23.246	133.727	0.474	2.333	0.429	0.71
26	472	74.564	1	106	26.503	22.676	7.344	0.755	1.169	0.856	0.872
27	3435	52.993	1	109	74.11	59.015	7.204	0.742	1.256	0.796	0.887
28	587	69.811	9	109	37.774	19.786	133.831	0.674	1.909	0.524	0.88
29	83987	59.704	1	115	412.505	259.235	176.005	0.477	1.591	0.628	0.802
30	48738	56.365	1	124	322.262	192.561	127.351	0.353	1.674	0.598	0.73
31	909	71.696	4	122	42.976	26.931	118.026	0.776	1.596	0.627	0.906
32	304	72.24	4	115	23.944	16.166	135.749	0.866	1.481	0.675	0.935
33	10497	68.307	2	122	130.443	102.46	142.646	0.608	1.273	0.785	0.821
34	65032	61.986	1	123	388.497	213.133	44.243	0.486	1.823	0.549	0.828
35	473	67.469	7	114	32.349	18.617	176.437	0.72	1.738	0.576	0.898
36	190	58.579	5	104	20.051	12.065	124.166	0.816	1.662	0.602	0.9
37	110	51.427	4	90	14.6	9.593	24.491	0.855	1.522	0.657	0.957
38	636	75.478	7	113	39.162	20.678	92.984	0.806	1.894	0.528	0.946
39	1379	64.738	3	116	55.183	31.818	122.334	0.665	1.734	0.577	0.869
40	10838	56.51	2	123	158.585	87.016	19.754	0.431	1.822	0.549	0.749
41	242	73.541	8	104	29.512	10.44	173.033	0.504	2.827	0.354	0.84
42	559	65.293	4	121	28.61	24.878	46.459	0.823	1.15	0.87	0.922
43	886	64.528	3	117	35.34	31.921	32.352	0.359	1.107	0.903	0.6
44	5235	51.975	5	110	123.004	54.189	179.157	0.512	2.27	0.441	0.773
45	626	55.685	6	96	29.384	27.125	177.224	0.899	1.083	0.923	0.975
46	5084	59.702	4	111	127.905	50.609	137.612	0.592	2.527	0.396	0.825
47	258	77.453	29	106	24.782	13.256	156.62	0.8	1.87	0.535	0.93
48	3245	61.647	6	125	85.061	48.573	152.457	0.728	1.751	0.571	0.874
49	280	82.839	18	112	21.377	16.678	56.813	0.852	1.282	0.78	0.903
50	419	90.384	11	114	26.31	20.277	138.953	0.805	1.298	0.771	0.915
51	3108	86.208	6	131	81.969	48.277	6.337	0.787	1.698	0.589	0.94
52	2089	89.499	7	115	56.412	47.15	141.305	0.922	1.196	0.836	0.963
53	4474	95.907	7	138	101.955	55.873	99.285	0.446	1.825	0.548	0.718
54	1474	92.98	9	130	70.548	26.603	30.786	0.513	2.652	0.377	0.764
55	35128	84.459	4	138	229.796	194.635	152.204	0.705	1.181	0.847	0.917
56	32581	72.446	3	140	313.183	132.458	12.544	0.317	2.364	0.423	0.697
57	6415	66.656	4	134	105.654	77.308	41.647	0.412	1.367	0.732	0.691
58	4098	58.134	4	131	86.562	60.277	23.111	0.422	1.436	0.696	0.663
59	2152	55.98	5	134	76.381	35.873	5.181	0.649	2.129	0.47	0.912
60	2086	71.733	3	137	80.323	33.066	127.758	0.545	2.429	0.412	0.837
61	2586	79.826	2	132	63.993	51.453	28.264	0.88	1.244	0.804	0.95
62	8769	84.76	4	136	132.9	84.011	129.653	0.625	1.582	0.632	0.855
63	4255	77.826	3	134	91.709	59.074	10.507	0.453	1.552	0.644	0.697
64	553	85.779	4	134	35.6	19.778	139.934	0.83	1.8	0.556	0.942
65	5800	73.718	1	133	97.808	75.503	75.516	0.625	1.295	0.772	0.839
66	1695	60.061	3	121	62.971	34.272	104.827	0.531	1.837	0.544	0.74
67	57483	69.176	3	132	379.561	192.827	172.068	0.58	1.968	0.508	0.863
68	83725	50.477	1	135	541.408	196.898	13.436	0.071	2.75	0.364	0.344
69	23355	75.054	1	135	219.924	135.213	84.738	0.288	1.627	0.615	0.678
70	3151	58.432	1	119	84.17	47.665	164.603	0.484	1.766	0.566	0.717
71	2639	95.741	18	129	64.631	51.988	145.977	0.838	1.243	0.804	0.927
72	2170	58.736	2	121	77.301	35.742	102.267	0.639	2.163	0.462	0.86
73	1329	61.749	2	127	76.123	22.229	23.196	0.524	3.425	0.292	0.804
74	2012	79.268	5	116	73.771	34.726	153.492	0.629	2.124	0.471	0.834
75	10598	68.339	2	125	177.759	75.911	154.092	0.645	2.342	0.427	0.914
76	1908	69.245	0	127	56.73	42.823	133.904	0.843	1.325	0.755	0.931
77	12627	71.965	0	125	169.688	94.745	1.944	0.44	1.791	0.558	0.783
78	703	77.435	4	110	48.343	18.515	17.306	0.661	2.611	0.383	0.937
79	5674	72.068	1	128	128.243	56.333	20.708	0.53	2.277	0.439	0.756
80	5433	67.633	1	129	127.888	54.091	7.621	0.567	2.364	0.423	0.835
81	6362	70.253	0	135	127.38	63.592	84.897	0.679	2.003	0.499	0.896
82	3504	78.374	1	125	88.157	50.608	140.255	0.676	1.742	0.574	0.844
83	1758	35.431	3	110	55.168	40.573	48.548	0.875	1.36	0.735	0.925
84	1682	70.885	1	130	63.503	33.724	93.456	0.722	1.883	0.531	0.885
85	8051	72.214	1	132	114.82	89.278	74.578	0.699	1.286	0.778	0.865
86	133561	58.167	0	134	487.766	348.641	49.207	0.112	1.399	0.715	0.538
87	3535	71.934	1	126	71.945	62.56	151.296	0.531	1.15	0.87	0.776
88	1254	84.032	6	131	48.52	32.907	51.745	0.606	1.474	0.678	0.797
89	1740	51.484	1	129	60.813	36.43	173.5	0.505	1.669	0.599	0.74
90	10591	50.186	0	126	204.649	65.893	101.194	0.293	3.106	0.322	0.577
91	16692	46.508	0	119	211.229	100.616	158.969	0.444	2.099	0.476	0.697
92	2299	90.964	4	128	66.458	44.045	110.342	0.795	1.509	0.663	0.927
93	8350	68.369	0	128	203.203	52.32	14.54	0.317	3.884	0.257	0.589
94	2901	87.593	1	129	68.837	53.658	75.857	0.816	1.283	0.779	0.916
95	7115	57.913	0	127	131.848	68.709	11.387	0.704	1.919	0.521	0.883
96	3471	56.998	0	125	79.789	55.388	39.336	0.783	1.441	0.694	0.919
97	6670	59.443	2	105	128.486	66.097	113.922	0.544	1.944	0.514	0.797
98	4405	60.866	0	124	104.189	53.831	113.512	0.474	1.935	0.517	0.73
99	11602	67.084	0	132	182.632	80.885	165.531	0.58	2.258	0.443	0.845
100	1750	76.013	0	130	57.922	38.468	7.643	0.584	1.506	0.664	0.761
101	663	89.41	21	125	37.422	22.558	105.608	0.783	1.659	0.603	0.955
102	568	70.201	1	124	32.323	22.374	111.538	0.63	1.445	0.692	0.78
103	992	71.954	1	127	43.665	28.926	146.826	0.782	1.51	0.662	0.905
104	2630	52.397	0	122	110.013	30.438	38.028	0.473	3.614	0.277	0.823
105	5076	60.751	0	121	94.629	68.298	159.86	0.659	1.386	0.722	0.844
106	3621	63.912	0	107	78.04	59.077	154.317	0.592	1.321	0.757	0.782
107	1782	55.485	0	113	97.272	23.326	108.802	0.361	4.17	0.24	0.74
108	35963	20.008	0	99	289.886	157.957	8.267	0.205	1.835	0.545	0.564
109	2409	26.104	0	86	83.381	36.786	28.411	0.691	2.267	0.441	0.879
110	52252	53.303	0	124	308.668	215.537	158.039	0.328	1.432	0.698	0.688
111	11185	42.432	0	114	159.625	89.216	24.026	0.563	1.789	0.559	0.832
112	5365	55.4	0	115	87.814	77.788	18.385	0.793	1.129	0.886	0.909
113	6233	40.423	0	122	96.611	82.145	75.762	0.492	1.176	0.85	0.818
114	11581	38.496	0	125	149.618	98.553	130.775	0.503	1.518	0.659	0.722
115	1091	32.509	0	120	65.624	21.168	28.239	0.547	3.1	0.323	0.856
116	5269	55.772	0	122	112.958	59.391	27.264	0.639	1.902	0.526	0.864
117	2105	54.871	0	116	85.484	31.353	155.138	0.382	2.726	0.367	0.667
118	2276	62.088	0	127	90.395	32.058	65.081	0.616	2.82	0.355	0.866
119	7230	45.327	2	104	124.585	73.89	22.609	0.653	1.686	0.593	0.861
120	583	43.933	1	101	33.282	22.304	58.577	0.797	1.492	0.67	0.894
121	1640	58.247	0	120	71.147	29.349	138.845	0.318	2.424	0.413	0.575
122	76491	53.564	0	127	376.521	258.661	123.876	0.439	1.456	0.687	0.797
123	924	60.932	0	108	43.853	26.827	136.303	0.872	1.635	0.612	0.939
124	1578	60.721	1	113	67.397	29.811	104.944	0.718	2.261	0.442	0.93
125	31453	55.082	0	132	258.445	154.954	163.553	0.357	1.668	0.6	0.717
126	4103	53.43	0	120	114.648	45.567	164.445	0.584	2.516	0.397	0.885
127	9758	50.3	0	128	113.277	109.68	160.534	0.751	1.033	0.968	0.89
128	20330	54.322	0	127	305.863	84.629	54.767	0.233	3.614	0.277	0.504
129	971	65.826	0	118	40.421	30.586	17.484	0.73	1.322	0.757	0.894
130	19755	61.921	0	132	236.503	106.353	100.549	0.215	2.224	0.45	0.532
131	694	100.399	4	123	34.105	25.909	8.811	0.715	1.316	0.76	0.859
132	989	54.254	0	115	42.471	29.649	119.113	0.783	1.432	0.698	0.894
133	8728	53.332	0	123	111.832	99.371	56.075	0.818	1.125	0.889	0.931
134	897	94.695	23	122	37.639	30.343	156.861	0.899	1.24	0.806	0.975
135	51761	79.307	0	129	428.381	153.845	2.546	0.316	2.784	0.359	0.693
136	2125	94.782	0	129	73.68	36.722	94.522	0.702	2.006	0.498	0.875
137	1991	77.98	0	125	57.004	44.471	71.453	0.747	1.282	0.78	0.877
138	18901	67.131	0	171	230.651	104.337	147.718	0.266	2.211	0.452	0.511
139	2383	72.959	0	129	63.615	47.695	63.513	0.661	1.334	0.75	0.85
140	5659	86.772	3	115	116.645	61.771	155.173	0.714	1.888	0.53	0.896
141	4453	65.491	0	123	77.9	72.782	156.551	0.89	1.07	0.934	0.951
142	6400	70.668	1	122	99.589	81.824	92.015	0.627	1.217	0.822	0.815
143	3110	67.962	1	127	72.748	54.432	63.825	0.542	1.336	0.748	0.768
144	1859	61.365	2	131	74.812	31.639	140.8	0.68	2.365	0.423	0.926
145	1010	73.81	2	113	43.762	29.386	6.251	0.82	1.489	0.671	0.905
146	1092	78.291	2	123	50.926	27.302	125.294	0.777	1.865	0.536	0.927
147	2178	73.478	1	126	80.314	34.528	100.566	0.263	2.326	0.43	0.476
148	1065	83.868	6	132	47.214	28.72	151.653	0.614	1.644	0.608	0.92
149	2238	80.866	0	129	84.367	33.775	176.074	0.67	2.498	0.4	0.908
150	21194	84.37	0	130	241.292	111.836	138.418	0.717	2.158	0.463	0.928
151	3827	101.462	8	129	90.723	53.709	157.251	0.714	1.689	0.592	0.894
152	20718	75.307	0	183	221.02	119.351	169.238	0.32	1.852	0.54	0.647
153	37844	72.803	0	127	277.778	173.464	6.839	0.282	1.601	0.624	0.744
154	7279	62.717	3	102	114.327	81.065	43.124	0.609	1.41	0.709	0.817
155	3181	74.994	0	122	77.513	52.251	113.163	0.664	1.483	0.674	0.856
156	4632	76.468	0	115	93.491	63.082	168.383	0.761	1.482	0.675	0.895
157	1548	62.342	2	116	68.529	28.761	9.595	0.613	2.383	0.42	0.872
158	61361	66.235	0	127	340.047	229.754	110.6	0.393	1.48	0.676	0.745
159	6058	72.904	0	123	101.88	75.709	172.302	0.47	1.346	0.743	0.737
160	556	96.408	29	130	29.514	23.986	48.536	0.711	1.23	0.813	0.783
161	2509	83.338	0	119	58.308	54.788	179.824	0.722	1.064	0.94	0.868
162	8158	72.78	0	114	111.801	92.907	117.706	0.831	1.203	0.831	0.927
163	473	80.81	1	120	25.073	24.02	15.729	0.773	1.044	0.958	0.863
164	820	74.079	1	121	44.278	23.579	144.008	0.749	1.878	0.533	0.919
165	330	73.236	18	117	21.322	19.706	176.515	0.855	1.082	0.924	0.948
166	5632	53.673	7	113	105.461	67.995	39.594	0.56	1.551	0.645	0.747
167	923	80.309	8	120	39.754	29.562	54.046	0.892	1.345	0.744	0.968
168	485	85.94	24	126	31.664	19.502	35.616	0.719	1.624	0.616	0.905
169	3959	86.414	2	132	73.822	68.282	6.928	0.826	1.081	0.925	0.93
170	909	68.779	3	128	41.645	27.792	1.945	0.865	1.498	0.667	0.951
171	1135	95.227	2	130	54.929	26.309	118.279	0.745	2.088	0.479	0.915
172	14998	71.928	0	107	175.319	108.921	80.305	0.485	1.61	0.621	0.774
173	5603	53.383	0	120	98.29	72.581	56.603	0.365	1.354	0.738	0.639
174	32756	57.195	0	118	277.198	150.457	117.906	0.658	1.842	0.543	0.87
175	18337	66.632	0	125	235.706	99.053	20.497	0.44	2.38	0.42	0.761
176	2660	69.548	0	115	114.094	29.685	174.785	0.435	3.844	0.26	0.744
177	43542	68.681	0	122	307.513	180.283	148.015	0.181	1.706	0.586	0.597
178	3456	56.378	0	121	100.153	43.936	157.953	0.64	2.28	0.439	0.872
179	23757	60.8	0	119	214.628	140.934	47.314	0.194	1.523	0.657	0.601
180	467	90.987	27	123	25.829	23.02	162.486	0.93	1.122	0.891	0.953
181	1303	71.245	7	118	52.388	31.668	172.995	0.618	1.654	0.604	0.845
182	42110	52.128	0	119	334.046	160.505	163.3	0.213	2.081	0.48	0.585
183	771	64.494	0	114	49.599	19.792	39.956	0.629	2.506	0.399	0.827
184	5800	33.476	0	96	134.865	54.757	152.186	0.565	2.463	0.406	0.8
185	53159	38.079	0	125	462.117	146.465	153.167	0.309	3.155	0.317	0.719
186	984	37.131	0	101	50.823	24.651	135.945	0.699	2.062	0.485	0.888
187	6935	69.897	3	130	131.453	67.172	60.952	0.779	1.957	0.511	0.937
188	26047	44.695	3	129	243.541	136.174	10.08	0.384	1.788	0.559	0.741
189	1513	81.024	9	135	55.922	34.448	11.184	0.646	1.623	0.616	0.885
190	2437	88.429	6	136	66.035	46.989	45.048	0.622	1.405	0.712	0.797
191	16537	69.498	3	136	185.43	113.55	81.311	0.214	1.633	0.612	0.453
192	3182	66.311	13	109	77.306	52.408	73.846	0.768	1.475	0.678	0.908
193	9902	54.004	15	118	162.725	77.478	131.719	0.563	2.1	0.476	0.8
194	13922	59.396	13	145	245.596	72.176	175.092	0.177	3.403	0.294	0.489
195	773	81.657	14	135	44.138	22.299	159.762	0.68	1.979	0.505	0.884
196	1071	55.841	15	133	46.61	29.256	78.898	0.863	1.593	0.628	0.972
197	545	62.655	16	136	45.688	15.188	55.048	0.426	3.008	0.332	0.678
198	5256	72.546	26	151	134.869	49.62	39.781	0.361	2.718	0.368	0.589
199	16157	42.017	0	125	214.197	96.041	25.095	0.621	2.23	0.448	0.882
200	3452	46.324	0	104	79.84	55.051	154.989	0.61	1.45	0.69	0.816
201	883	88.247	4	119	43.995	25.555	126.936	0.774	1.722	0.581	0.881
202	1598	62.925	0	120	57.906	35.137	176.927	0.832	1.648	0.607	0.927
203	720	81.025	18	113	36.198	25.326	179.919	0.862	1.429	0.7	0.947
204	5460	53.612	0	106	106.237	65.438	80.051	0.377	1.623	0.616	0.659
205	1396	33.463	0	110	48.681	36.512	123.563	0.864	1.333	0.75	0.921
206	38866	28.373	0	110	252.707	195.823	113.098	0.402	1.29	0.775	0.723
207	5588	60.815	0	107	128.899	55.197	5.458	0.543	2.335	0.428	0.821
208	1090	84.402	0	125	61.782	22.463	7.893	0.628	2.75	0.364	0.854
209	27378	66.178	0	131	242.549	143.719	84.524	0.296	1.688	0.593	0.702
210	453	84.309	23	120	34.662	16.64	164.127	0.713	2.083	0.48	0.884
211	292	81.815	28	108	22.634	16.426	24.345	0.849	1.378	0.726	0.948
212	539	58.386	0	100	34.961	19.63	176.925	0.818	1.781	0.561	0.959
213	447	46.242	0	111	25.788	22.07	98.627	0.855	1.168	0.856	0.947
214	367	73.21	18	113	34.499	13.545	0.769	0.631	2.547	0.393	0.855
215	242	88.719	4	119	20.825	14.796	134.778	0.824	1.407	0.71	0.906
216	194	68.634	1	119	21.606	11.432	145.084	0.643	1.89	0.529	0.793
217	784	44.106	1	116	40.937	24.384	27.523	0.593	1.679	0.596	0.817
218	302	82.023	4	119	25.779	14.916	111.792	0.799	1.728	0.579	0.928
219	235	88.434	1	116	21.407	13.977	90.152	0.693	1.532	0.653	0.869
220	321	70.791	2	119	27.648	14.783	67.782	0.728	1.87	0.535	0.892
221	297	75.855	6	108	24.346	15.532	46.795	0.807	1.567	0.638	0.907
222	191	77.052	19	116	17.283	14.071	48.127	0.769	1.228	0.814	0.882
223	1407	68.037	0	113	64.856	27.622	138.159	0.215	2.348	0.426	0.565
224	1283	57.111	2	97	73.947	22.091	51.767	0.404	3.347	0.299	0.736
225	368	69.495	20	112	29.784	15.732	156.819	0.446	1.893	0.528	0.725
226	914	78.908	0	126	46.802	24.865	122.615	0.52	1.882	0.531	0.816
227	269	66.201	2	115	29.496	11.612	66.95	0.538	2.54	0.394	0.828
228	116	86.647	31	112	16.497	8.953	67.925	0.667	1.843	0.543	0.896
229	140	83.05	24	115	15.253	11.687	49.333	0.621	1.305	0.766	0.912
230	251	89.602	36	117	28.006	11.411	6.362	0.593	2.454	0.407	0.838

## Sheet: LC2029
	Area	Mean	Min	Max	Major	Minor	Angle	Circ.	AR	Round	Solidity
1	27702	51.534	1	143	406.4	86.79	2.237	0.281	4.683	0.214	0.696
2	849	102.562	16	144	42.393	25.499	153.981	0.718	1.663	0.601	0.941
3	38751	64.206	0	144	247.721	199.173	5.58	0.326	1.244	0.804	0.702
4	43767	77.97	4	144	277.458	200.845	167.477	0.515	1.381	0.724	0.843
5	5427	30.094	0	115	154.501	44.724	8.332	0.571	3.455	0.289	0.927
6	222	66.914	9	143	27.348	10.336	170.631	0.659	2.646	0.378	0.915
7	517	92.493	24	143	27.852	23.635	72.153	0.807	1.178	0.849	0.874
8	180	113.983	27	142	17.275	13.267	179.148	0.887	1.302	0.768	0.916
9	39090	72.148	1	141	259.818	191.56	146.257	0.364	1.356	0.737	0.755
10	26498	59.355	5	143	213.569	157.974	33.569	0.445	1.352	0.74	0.793
11	9178	102.308	8	144	124.475	93.881	107.773	0.619	1.326	0.754	0.921
12	22044	97.558	6	144	177.452	158.168	123.977	0.702	1.122	0.891	0.876
13	56492	69.11	4	139	321.323	223.849	145.31	0.828	1.435	0.697	0.974
14	1331	72.605	27	113	48.294	35.091	19.883	0.742	1.376	0.727	0.928
15	25490	50.268	0	144	295.251	109.923	15.72	0.327	2.686	0.372	0.606
16	3180	81.946	0	143	93.717	43.203	179.099	0.681	2.169	0.461	0.935
17	84165	77.046	1	144	409.52	261.677	134.789	0.261	1.565	0.639	0.663
18	36528	41.43	0	142	231.643	200.778	28.393	0.457	1.154	0.867	0.768
19	4071	67.263	3	140	145.22	35.693	90.703	0.381	4.069	0.246	0.753
20	5502	79.014	0	141	86.257	81.215	76.429	0.849	1.062	0.942	0.94
21	11725	67.735	3	138	198.601	75.169	17.489	0.635	2.642	0.378	0.937
22	4510	89.229	10	138	83.432	68.826	7.121	0.859	1.212	0.825	0.96
23	216	111.19	45	133	21.734	12.654	165.829	0.839	1.717	0.582	0.954
24	13105	73.866	4	142	176.013	94.799	177.788	0.402	1.857	0.539	0.725
25	184	108.043	49	135	19.444	12.049	111.998	0.778	1.614	0.62	0.878
26	5172	98.248	3	145	95.436	69.001	148.239	0.827	1.383	0.723	0.953
27	179	100.095	40	130	18.247	12.491	56.685	0.804	1.461	0.685	0.916
28	563	81.187	11	122	29.544	24.263	130.638	0.787	1.218	0.821	0.91
29	2875	69.232	3	144	67.263	54.421	87.366	0.841	1.236	0.809	0.958
30	3394	97.596	7	133	86.43	49.998	20.331	0.681	1.729	0.578	0.934
31	977	94.687	19	142	35.745	34.801	22.226	0.854	1.027	0.974	0.942
32	12797	21.57	0	129	162.548	100.239	1.003	0.75	1.622	0.617	0.953
33	8156	36.473	0	123	133.486	77.795	169.446	0.781	1.716	0.583	0.959
34	20742	64.673	0	144	216.232	122.135	161.472	0.548	1.77	0.565	0.826
35	7935	67.786	3	144	195.07	51.793	21.233	0.503	3.766	0.266	0.871
36	2955	105.546	9	144	82.293	45.72	23.052	0.666	1.8	0.556	0.882
37	1707	26.654	0	137	103.494	21	167.036	0.189	4.928	0.203	0.444
38	334	114.832	28	136	24.81	17.141	154.187	0.902	1.447	0.691	0.945
39	785	87.627	7	125	43.714	22.864	97.8	0.772	1.912	0.523	0.946
40	3384	80.604	12	144	81.119	53.115	9.729	0.843	1.527	0.655	0.951
41	263	104.133	23	141	20.33	16.471	172.515	0.911	1.234	0.81	0.943
42	4896	97.411	11	143	112.926	55.202	174.183	0.722	2.046	0.489	0.928
43	6607	91.741	15	143	108.94	77.22	162.824	0.823	1.411	0.709	0.948
44	9560	82.926	3	138	126.326	96.355	117.631	0.84	1.311	0.763	0.971
45	14924	95.356	0	144	163.766	116.03	172.998	0.813	1.411	0.709	0.959
46	8475	79.265	6	142	155.795	69.262	6.754	0.575	2.249	0.445	0.862
47	2135	91.287	7	144	55.841	48.68	109.792	0.878	1.147	0.872	0.945
48	9847	88.983	0	143	159.192	78.758	5.783	0.788	2.021	0.495	0.978
49	974	101.705	8	143	41.289	30.035	48.233	0.883	1.375	0.727	0.953
50	554	75.977	7	143	39.825	17.712	176.274	0.699	2.249	0.445	0.904
51	3914	78.907	3	143	79.082	63.016	175.808	0.843	1.255	0.797	0.947
52	22504	79.077	0	145	183.889	155.817	178.208	0.692	1.18	0.847	0.881
53	513	87.199	1	145	29.462	22.17	31.313	0.87	1.329	0.752	0.945
54	1382	74.545	12	143	51.08	34.448	12.993	0.79	1.483	0.674	0.911
55	1351	58.882	0	143	49.622	34.665	43.142	0.855	1.431	0.699	0.938
56	587	104.118	14	140	32.487	23.006	10.858	0.875	1.412	0.708	0.962
57	74477	56.293	0	140	377.959	250.892	176.859	0.261	1.506	0.664	0.62
58	30357	67.892	0	140	324.307	119.182	12.227	0.285	2.721	0.367	0.644
59	18815	28.537	1	139	198.478	120.699	12.362	0.67	1.644	0.608	0.913
60	24928	69.609	0	140	298.992	106.154	20.768	0.342	2.817	0.355	0.728
61	1093	70.835	11	115	39.574	35.166	46.19	0.932	1.125	0.889	0.956
62	467	76.949	11	105	28.016	21.223	163.494	0.82	1.32	0.758	0.896
63	297	78.589	1	136	28.694	13.179	161.409	0.722	2.177	0.459	0.903
64	1079	92.85	8	139	46.315	29.662	1.91	0.775	1.561	0.64	0.924
65	1536	63.967	2	138	57.559	33.977	1.642	0.745	1.694	0.59	0.889
66	36620	80.847	0	141	312.589	149.161	1.585	0.659	2.096	0.477	0.905
67	10481	17.397	1	99	141.5	94.31	5.147	0.753	1.5	0.666	0.94
68	14898	86.655	8	143	147.41	128.68	119.433	0.872	1.146	0.873	0.966
69	6447	94.85	3	143	103.787	79.091	152.252	0.791	1.312	0.762	0.949
70	3147	84.289	0	137	64.357	62.261	105.592	0.871	1.034	0.967	0.939
71	663	98.57	7	138	41.256	20.462	13.498	0.805	2.016	0.496	0.964
72	157	97.65	34	136	14.888	13.427	61.398	0.755	1.109	0.902	0.807
73	231	97.892	18	143	19.987	14.715	153.579	0.853	1.358	0.736	0.92
74	925	118.028	27	143	36.552	32.221	26.142	0.853	1.134	0.881	0.923
75	690	78.846	5	142	39.089	22.475	134.368	0.533	1.739	0.575	0.782
76	904	109.554	37	143	40.298	28.563	129.512	0.818	1.411	0.709	0.927
77	2277	78.203	11	143	66.563	43.555	12.245	0.802	1.528	0.654	0.934
78	11810	90.462	17	144	144.222	104.262	46.061	0.675	1.383	0.723	0.893
79	864	71.929	12	115	45.027	24.432	54.764	0.627	1.843	0.543	0.845
80	207	91.01	11	136	22.482	11.723	168.945	0.617	1.918	0.521	0.885
81	7110	25.281	0	138	111.792	80.979	25.434	0.886	1.381	0.724	0.966
82	451	84.406	7	143	33.338	17.225	71.91	0.659	1.935	0.517	0.866
83	33896	82.416	1	144	285.859	150.976	84.654	0.358	1.893	0.528	0.733
84	32727	82.333	0	140	356.45	116.901	173.884	0.403	3.049	0.328	0.758
85	2434	73.516	11	143	79.451	39.006	5.587	0.744	2.037	0.491	0.936
86	236	63.301	4	137	19.623	15.313	45.617	0.889	1.282	0.78	0.938
87	5332	85.504	7	139	130.629	51.971	40.078	0.699	2.513	0.398	0.929
88	6256	59.517	5	140	106.918	74.5	81.155	0.703	1.435	0.697	0.87
89	9319	40.013	0	130	214.61	55.288	5.507	0.49	3.882	0.258	0.912
90	56752	81.917	0	145	273.76	263.95	159.733	0.708	1.037	0.964	0.919
91	32964	74.425	2	145	375.065	111.903	173.008	0.4	3.352	0.298	0.768
92	16518	74.978	1	145	159.649	131.735	29.054	0.728	1.212	0.825	0.892
93	2702	72.439	17	135	83.596	41.154	159.681	0.791	2.031	0.492	0.969
94	518	68.99	21	126	32.266	20.441	151.857	0.752	1.579	0.634	0.919
95	377	97.854	22	144	31.262	15.355	162.178	0.749	2.036	0.491	0.917
96	6388	92.766	6	144	113.835	71.449	149.016	0.849	1.593	0.628	0.948
97	638	83.335	17	136	32.226	25.207	155.763	0.861	1.278	0.782	0.944
98	218	113.881	59	138	17.795	15.598	6.238	0.949	1.141	0.877	0.965
99	620	105.542	31	141	31.946	24.711	152.212	0.867	1.293	0.774	0.958
100	44783	67.747	0	145	358.192	159.187	3.686	0.608	2.25	0.444	0.898
101	1267	74.522	7	141	45.283	35.625	6.812	0.862	1.271	0.787	0.942
102	53062	73.892	0	143	286.677	235.668	99.558	0.503	1.216	0.822	0.792
103	16425	49.247	1	141	207.51	100.781	174.464	0.68	2.059	0.486	0.925
104	2188	83.199	3	136	59.399	46.901	5.935	0.797	1.266	0.79	0.921
105	1542	115.409	42	136	49.364	39.772	161.675	0.879	1.241	0.806	0.946
